# Supplementary material for: mTORC1 upregulates B7-H3/CD276 to inhibit antitumor T cells and drive tumor immune evasion
Source: PubMed Central journal article supplement (PMC9984496; doi:10.1038/s41467-023-36881-7), 2023-03-03
Supplement: 41467_2023_36881_MOESM1_ESM.pdf [file 41467_2023_36881_MOESM1_ESM.pdf]

Supplementary Information for

**mTORC1 upregulates B7-H3/CD276 to inhibit antitumor T cells  
and drive tumor immune evasion**

Heng-Jia Liu\*, Heng Du, Damir Khabibullin, Mahsa Zarei, Kevin Wei, Gordon J. Freeman, David J. Kwiatkowski, Elizabeth P. Henske\*.

\*Corresponding author. Email: [hliu1@bwh.harvard.edu](mailto:hliu1@bwh.harvard.edu) (HJ Liu) & [ehenske@bwh.harvard.edu](mailto:ehenske@bwh.harvard.edu) (EP Henske)

# Supplementary Fig. 1

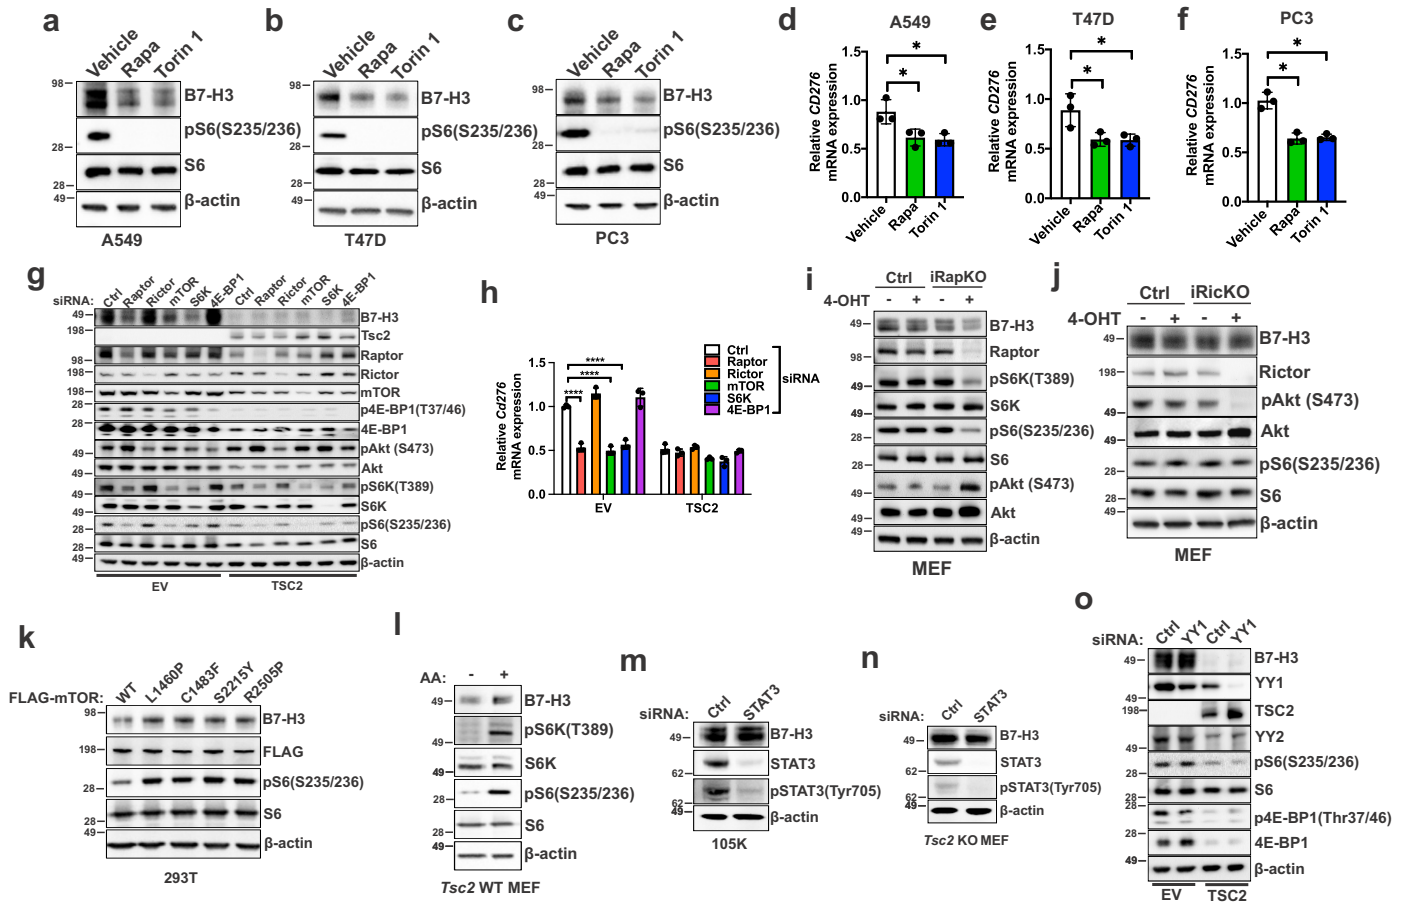

**Supplementary Fig. 1. B7-H3 expression is regulated by mTORC1, but not mTORC2, STAT3 or YY1.**

**a-c**, Suppression of B7-H3 protein expression in A549 cells (**a**), T47D cells (**b**), and PC3 cells (**c**) after treatment with Rapamycin (Rapa) or Torin 1 for 24 hrs (n = 3).

**d-f**, Suppression of B7-H3 mRNA expression in A549 cells (**d**), T47D cells (**e**), and PC3 cells (**f**) (n = 3) treated as in **a-c**. Means  $\pm$  SD, one-way ANOVA with Dunnett's test, \*  $p < 0.05$ .

**g**, Suppression of B7-H3 with downregulation of Raptor, mTOR, and S6K. *Tsc2*<sup>-/-</sup> 105K cells with stable reconstitution of TSC2 or empty vector (EV) were transfected with non-targeting control siRNA (Ctrl) or SMARTpool siRNA targeting Raptor, Rictor, mTOR, S6K, or 4E-BP1 for 48 hr (n = 3).

**h**, B7-H3 mRNA expression in the cells from (**g**) (n = 3). Means  $\pm$  SD, two-way ANOVA with Holm-Sidak's multiple comparisons test, \*\*\*\*  $p < 0.0001$ .

**i**, Knockout of Raptor in iRapKO MEFs decreases B7-H3 expression. iRapKO or control (Ctrl) MEFs were treated with 1  $\mu$ M 4-hydroxytamoxifen (4-OHT) for 72 hr (n = 3).

**j**, Knockout of Rictor in iRickO MEFs does not affect B7-H3 expression. iRickO or control (Ctrl) MEFs were treated with 1  $\mu$ M 4-hydroxytamoxifen (4-OHT) for 72 hr (n = 3).

**k**, Immunoblot analysis of HEK293T cells transfected with wild-type mTOR (FLAG-mTOR-WT), constitutive active mutant mTOR in expression vectors followed by whole-cell-lysis 48 hr after transfection (n = 3).

**l**, Immunoblot analysis of WT MEFs that were starved of amino acid for 16 hr and re-stimulated with MEM amino acid for 24 hr (n = 3).

**m,n**, B7-H3 protein expression in *Tsc2*<sup>-/-</sup> 105K cells (**m**) and *Tsc2* KO MEFs (**n**) following transfection with control siRNA or SMARTpool siRNA targeting STAT3 for 48 hr (n = 3).

**o**, B7-H3 mRNA expression in *Tsc2*<sup>-/-</sup> 105K cells with stable reconstitution of TSC2 or empty vector (EV) following transfection with control siRNA (Ctrl) or SMARTpool siRNAs targeting YY1 for 48 hr (n = 3).

Source data and exact p values are provided in the Source data file.

# Supplementary Fig. 2

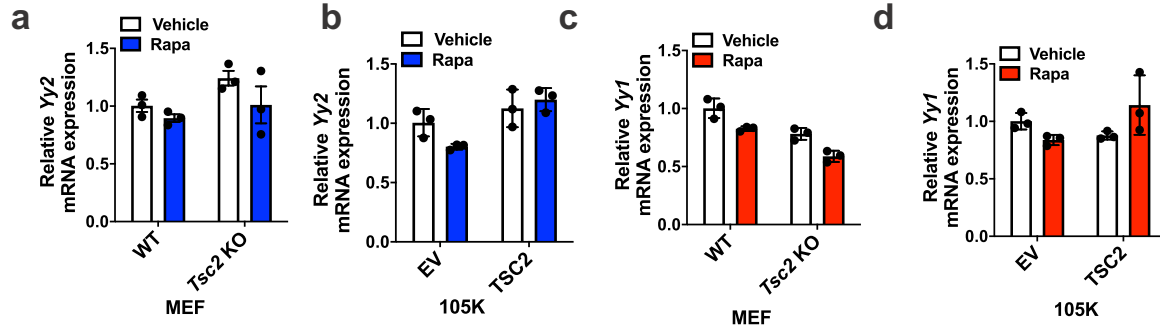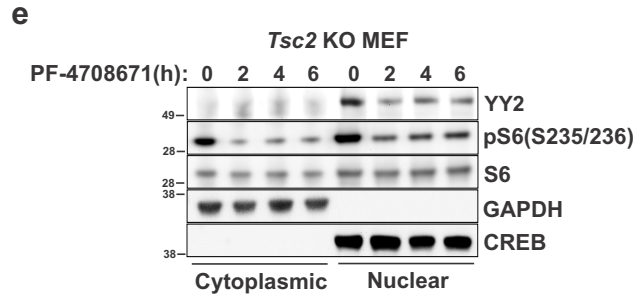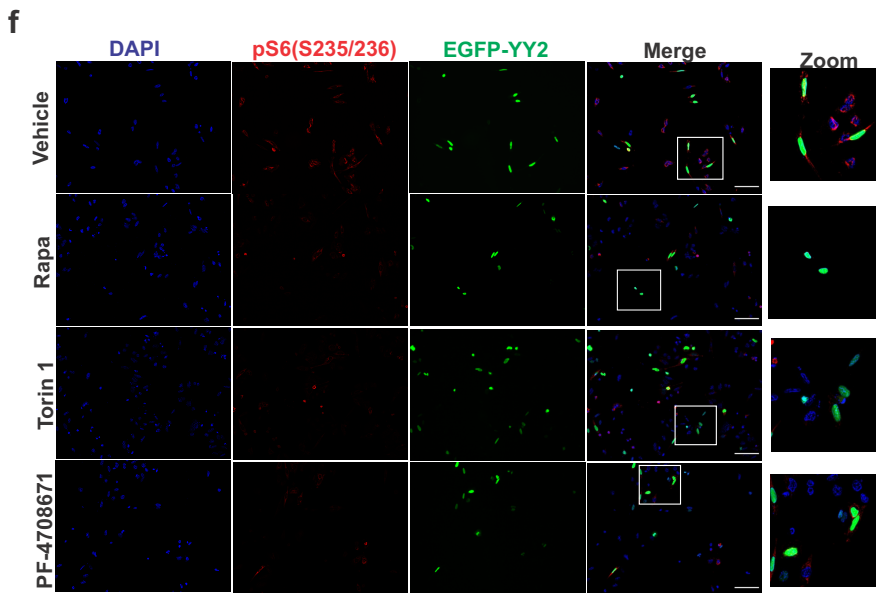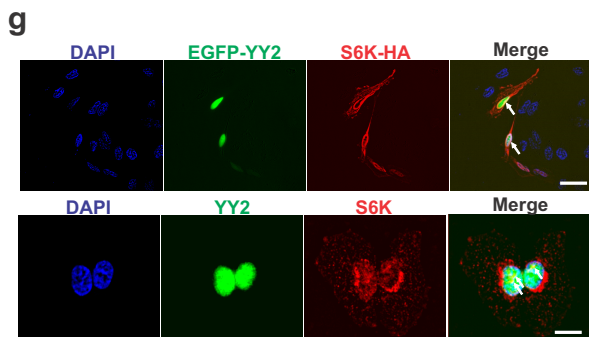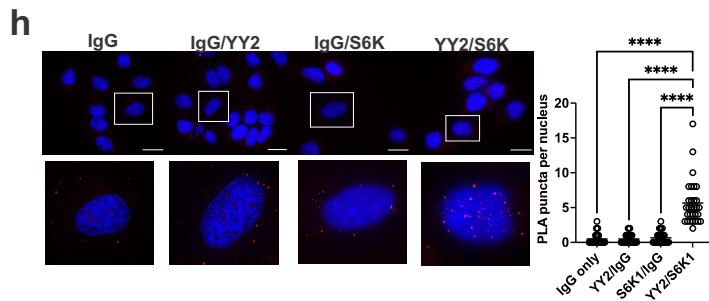

**Supplementary Fig. 2. S6K forms a complex with YY2 in the nucleus.**

**a,b**, YY2 mRNA expression in *Tsc2*-WT and *Tsc2* KO MEFs (**a**) and *Tsc2*<sup>-/-</sup> 105K cells with stable reconstitution of TSC2 or empty vector (EV) (**b**) following 20 nM Rapamycin (Rapa) or vehicle control for 24 hr (n = 3). Means ± SD, two-tailed unpaired student's t-test.

**c,d**, YY1 mRNA expression in *Tsc2*-WT and *Tsc2* KO MEFs (**c**) and *Tsc2*<sup>-/-</sup> 105K cells with stable reconstitution of TSC2 or empty vector (EV) (**d**) following 20 nM Rapamycin (Rapa) or vehicle control for 24 hr (n = 3). Means ± SD, two-tailed unpaired student's t-test.

**e**, Cytoplasmic and nuclear fractions of *Tsc2* KO MEFs following 10 μM PF-4708671 treatment for the indicated time points (n = 3).

**f**, Immunofluorescent staining of HeLa cells stably expressing EGFP-YY2 and treated with 20 nM rapamycin (Rapa), 500 nM Torin 1, 30 μM PF-4708671 or vehicle for 2 hr. Cells were fixed and stained with pS6 (S235/S236) and DAPI (n = 3). Scale bar = 100 μm.

**g**, Immunofluorescent staining of parental HeLa cells with anti-YY2 and S6K antibodies (n = 3). White arrows indicate co-localization of YY2 and S6K. Top panel: scale bar = 100 μm, bottom panel: scale bar = 20 μm.

**h**, Left panel: Representative images of in situ proximity ligation assay between S6K and YY2 (red) in HeLa cells. Data are representative of three independent experiments. Scale bar = 30 μm. Right panel: Quantification of the number of PLA puncta per nucleus. Column 1, IgG; column 2, mouse anti-YY2 and IgG; column 3, rabbit anti-S6K antibody and IgG; column 4, mouse anti-YY2 and rabbit anti-S6K antibodies. n = 30 cells. Means ± SD, one-way ANOVA with Dunnett's multiple comparisons test, \*\*\*\*  $p < 0.0001$ .

Source data are provided in the Source data file.

# Supplementary Fig. 3

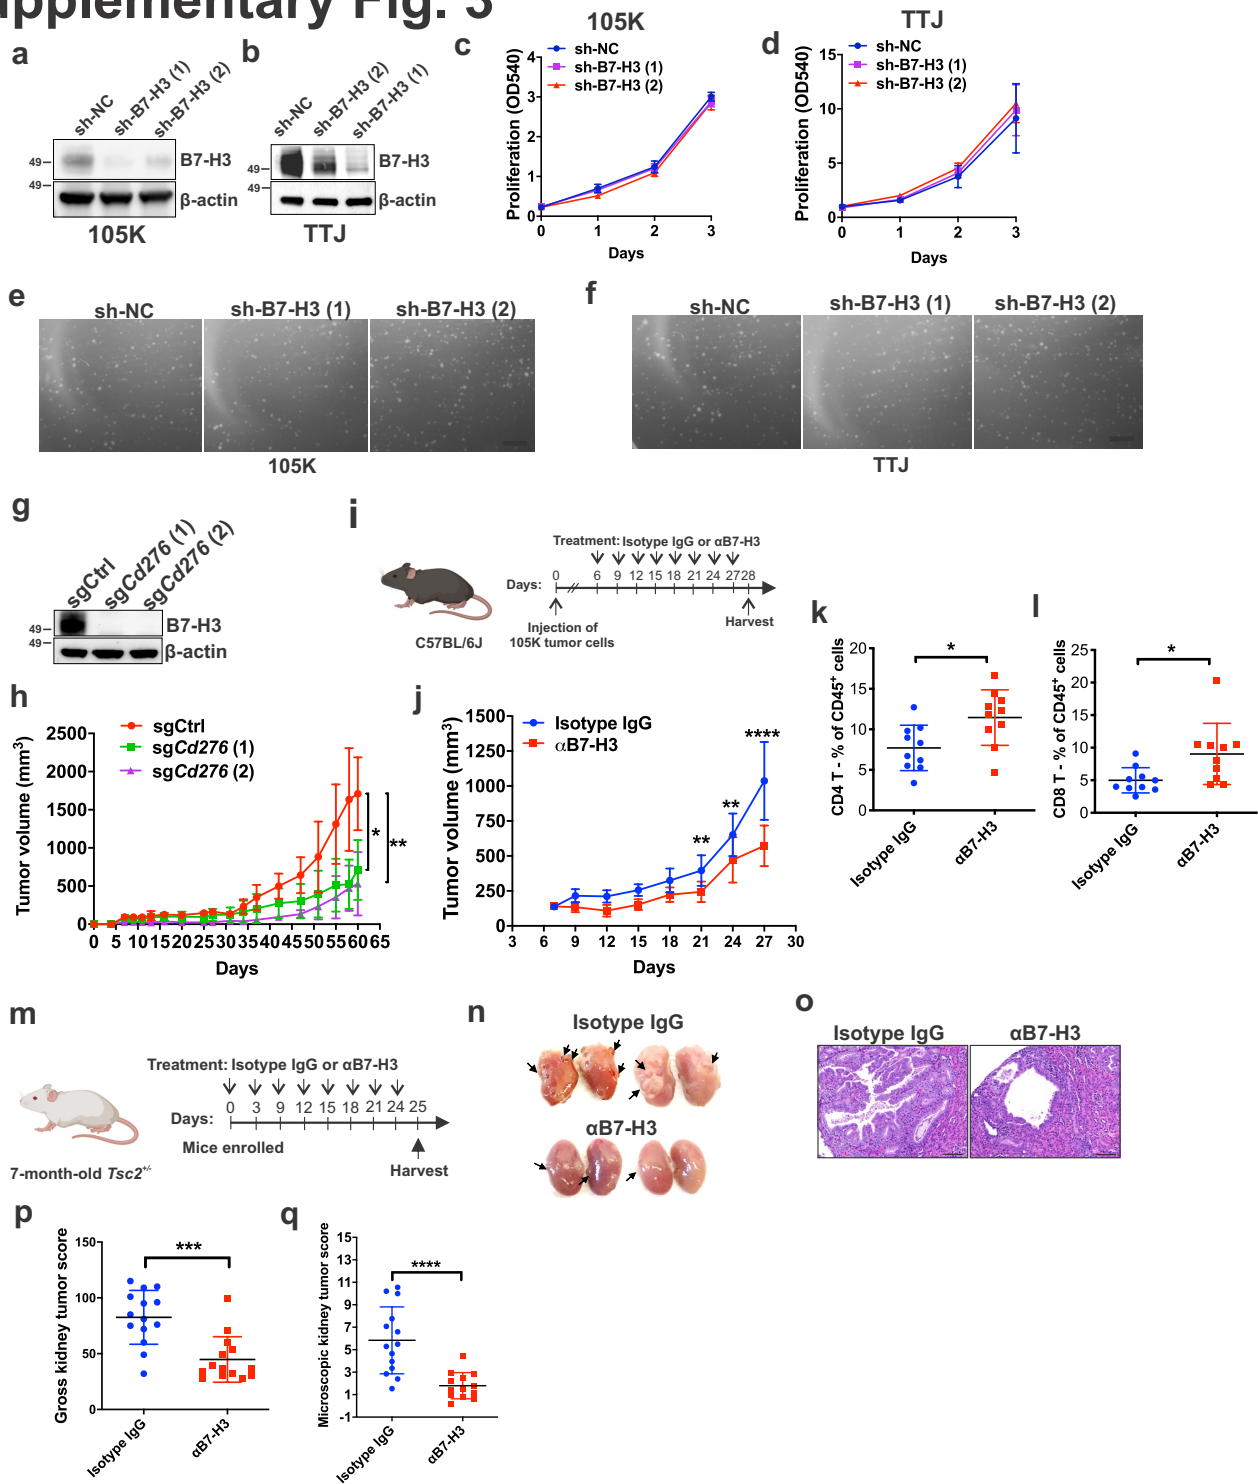

**Supplementary Fig. 3. The effects of B7-H3 inhibition *in vitro* and *in vivo*.**

**a,b**, Immunoblot of sh-NC, sh-B7-H3 (1), and sh-B7-H3 (2) *Tsc2*<sup>-/-</sup> 105K cells (**a**) or *Tsc2*<sup>-/-</sup> TTJ cells (**b**) (n = 3).

**c,d**, Cell proliferation assessed by crystal violet staining of the cells in (**c**) and (**d**) (n = 8). Means ± SD, one-way ANOVA with Dunnett's multiple comparisons test.

**e,f**, Representative images of the cells in **a**, **b** grown in soft agar for 3 weeks (n = 3).

**g**, Immunoblot analysis of whole-cell lysates derived from sgCtrl, sg*Cd276* (1), and sg*Cd276* (2) *Tsc2*<sup>-/-</sup> 105K cells (n = 3).

**h**, Subcutaneous growth of sgCtrl, sg*Cd276* (1), and sg*Cd276* (2) *Tsc2*<sup>-/-</sup> 105K cells in wild-type C57BL/6J mice. n = 7 mice for sgCtrl and sg*Cd276* (1), n = 8 mice for sg*Cd276* (2). Means ± SD, nonparametric Kruskal-Wallis's test with Dunn's multiple comparisons test, \* *p* < 0.05, \*\* *p* < 0.01.

**i**, Experimental design for treatment of *Tsc2*<sup>-/-</sup> 105K tumors with isotype control antibody (Isotype IgG) or anti-B7-H3 antibody (α-B7-H3) (Created with Biorender.com).

**j**, Growth of *Tsc2*<sup>-/-</sup> 105K tumors treated as depicted in **i**. n = 9 mice for Isotype IgG, n = 10 mice for anti-B7-H3 antibody. Means ± SD, Mann-Whitney U Test, \*\* *p* < 0.01, \*\*\*\* *p* < 0.0001.

**k,l**, Flow cytometry analysis of tumor-infiltrating CD4<sup>+</sup> (**k**) and CD8<sup>+</sup> (**l**) T cells from *Tsc2*<sup>-/-</sup> 105K tumors treated as depicted in (**i**). 10 mice per treatment group. Means ± SD, Mann-Whitney U Test, \* *p* < 0.05.

**m**, Experimental design for *Tsc2*<sup>+/-</sup> mice treated with isotype control antibody (Isotype IgG) or anti-B7-H3 antibody (α-B7-H3) (Created with Biorender.com).

**n**, Representative kidneys of *Tsc2*<sup>+/-</sup> mice treated as depicted in **m**.

**o**, Representative H&E images of *Tsc2*<sup>+/-</sup> mice treated as depicted in **m**.

**p**, Gross tumor score of kidneys of *Tsc2*<sup>+/-</sup> mice treated as depicted in **m**. n = 14 kidneys per treatment group, each dot represents one kidney. Means ± SD, Mann-Whitney U Test, \*\*\* *p* < 0.001.

**q**, Microscopic tumor score of *Tsc2*<sup>+/-</sup> mice treated as depicted in **m**. n = 14 kidneys per treatment group, each dot represents one kidney. Means ± SD, Mann-Whitney U Test, \*\*\*\* *p* < 0.0001.

Source data and exact *p* values are provided in the Source data file.

# Supplementary Fig. 4

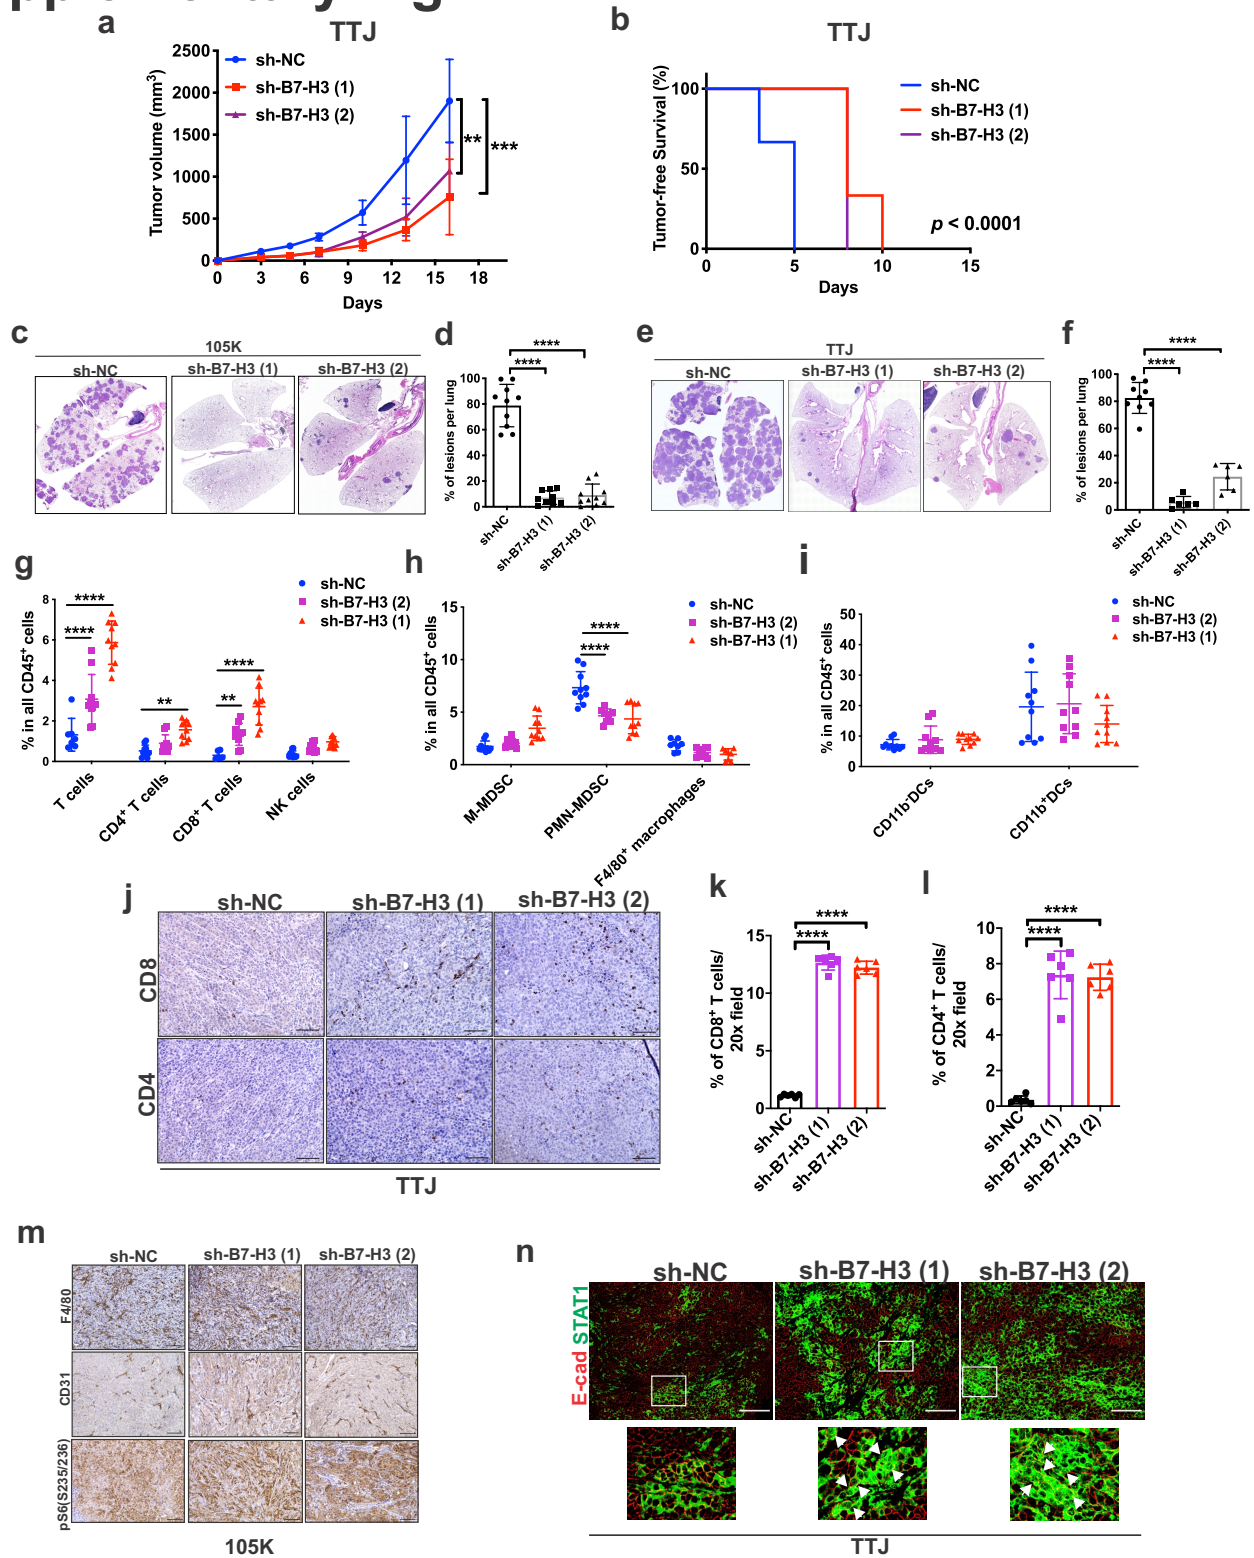



**Supplementary Fig. 4. B7-H3 deficiency in *Tsc2*<sup>-/-</sup> TTJ tumor cells suppresses subcutaneous tumor growth and lung tumor burden in models of metastasis.**

**a**, Subcutaneous tumor growth of sh-NC, sh-B7-H3 (1), and sh-B7-H3 (2) *Tsc2*<sup>-/-</sup> TTJ tumors in WT C57BL/6J mice.  $n = 6$  mice per group, means  $\pm$  SD, one-way ANOVA with Dunnett's multiple comparisons test, \*\*  $p < 0.01$ , \*\*\*  $p < 0.001$ .

**b**, Tumor-free survival curve of mice in **a**. Log-rank analysis.

**c**, Representative H&E images of lungs with sh-NC, sh-B7-H3 (1), and sh-B7-H3 (2) *Tsc2*<sup>-/-</sup> 105K tumors in WT C57BL/6J mice.

**d**, Percentage of lung area occupied by tumor per lung in **(c)**.  $n = 9$  mice for sh-NC and sh-B7-H3 (2),  $n = 10$  mice for sh-B7-H3 (1), means  $\pm$  SD, one-way ANOVA with Dunnett's multiple comparisons test, \*\*\*\*  $p < 0.0001$ .

**e**, Representative H&E images of lungs with sh-NC, sh-B7-H3 (1), or sh-B7-H3 (2) *Tsc2*<sup>-/-</sup> TTJ tumors in WT C57BL/6J mice.

**f**, Percentage of lung area occupied by tumor per lung in **(e)**.  $n = 6-9$  mice per group, means  $\pm$  SD, one-way ANOVA with Dunnett's multiple comparisons test, \*\*\*\*  $p < 0.0001$ .

**g-i**, Percentage of indicated cell types within CD45<sup>+</sup> TILs from sh-NC, sh-B7-H3 (1), and sh-B7-H3 (2) *Tsc2*<sup>-/-</sup> TTJ tumors.  $n = 7$  tumors for T cells,  $n = 10$  tumors for CD4<sup>+</sup> T and NK cells,  $n = 6$  tumors for CD8<sup>+</sup> T cells in sh-NC,  $n = 10$  tumors for all cell types in sh-B7-H3 (1), and sh-B7-H3 (2), means  $\pm$  SD, two-way ANOVA with Holm-Sidak's multiple comparisons test, \*\*  $p < 0.01$ , \*\*\*\*  $p < 0.0001$ .

**j-l**, Representative images of CD4 and CD8 immunohistochemical staining on sections from *Tsc2*<sup>-/-</sup> sh-NC, sh-B7-H3 (1), and sh-B7-H3 (2) TTJ subcutaneous tumors **(j)**. Scale bar = 100  $\mu$ m. Quantification of CD8<sup>+</sup> **(k)** or CD4<sup>+</sup> **(l)** T cells in each group ( $n = 6$ /group). Means  $\pm$  SD, one-way ANOVA with Dunnett's multiple comparisons test, \*\*\*\*  $p < 0.0001$ .

**m**, Representative images of F4/80, CD31, and pS6 (S235/236) immunohistochemical staining on tumor sections from *Tsc2*<sup>-/-</sup> 105K subcutaneous tumors transduced with sh-NC, sh-B7-H3 (1), and sh-B7-H3 (2) ( $n = 3$ ). Scale bar = 100  $\mu$ m.

**n**, Representative images of E-cadherin and STAT1 immunofluorescent staining on subcutaneous TTJ tumor sections of the indicated groups (n = 3). Scale bar = 100  $\mu$ m. White arrows indicate cells with nuclear STAT1.

Source data and exact p values are provided in the Source data file.

# Supplementary Fig. 5

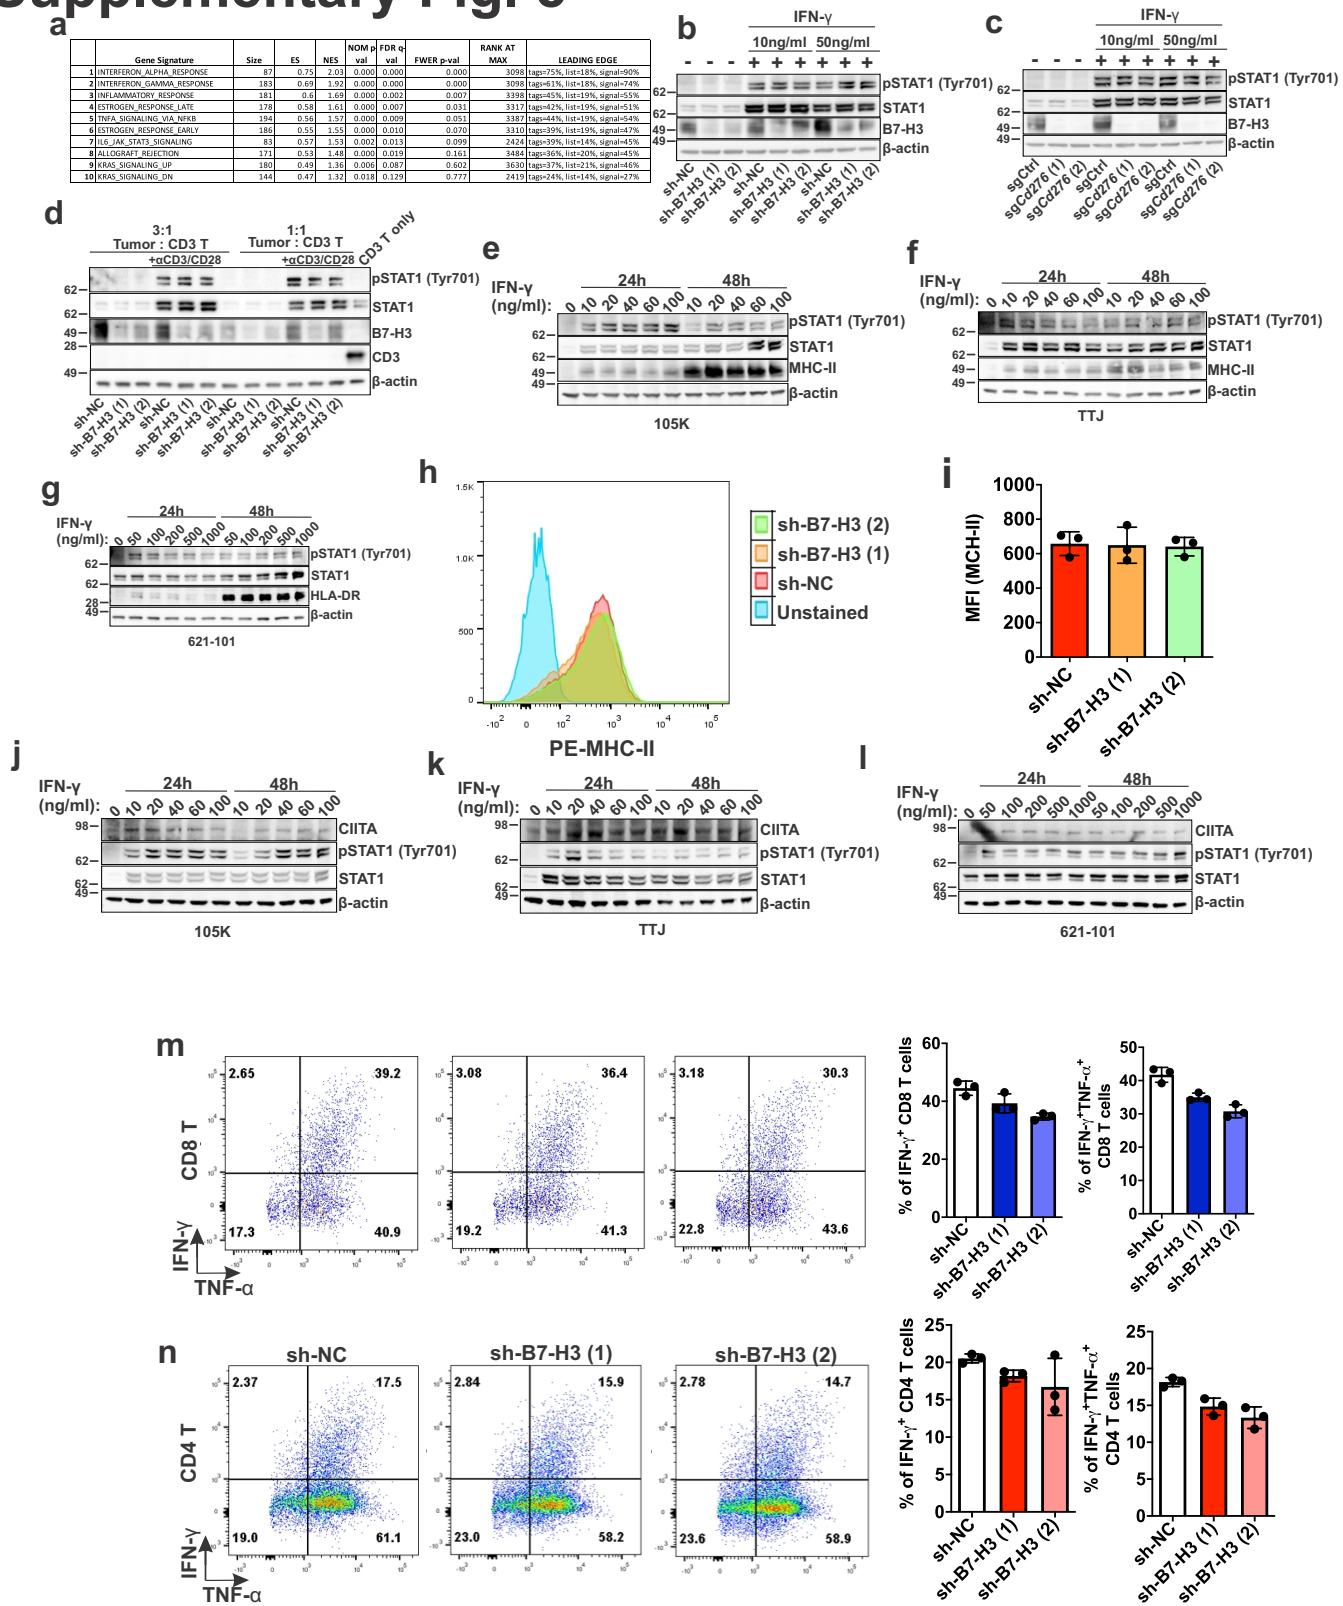

**Supplementary Fig. 5. The effects of B7-H3 suppression *in vivo* and *in vitro* relating to IFN- $\gamma$ .**

**a**, Top 10 activated gene signatures identified by gene set enrichment analysis in B7-H3 knockdown *Tsc2*<sup>-/-</sup> 105K subcutaneous tumors compared to controls (n = 3). ES = Enrichment Score, NES = Normalized Enrichment Score, NOM = Nominal, FDR = False Discovery Rate.

**b**, Immunoblot analysis of sh-NC, sh-B7-H3 (1), and sh-B7-H3 (2) *Tsc2*<sup>-/-</sup> 105K cells treated with IFN- $\gamma$  for the indicated time points and concentrations (n = 3).

**c**, Immunoblot analysis of sgCtrl, sg*Cd276* (1), and sg*Cd276* (2) *Tsc2*<sup>-/-</sup> 105K cells treated with IFN- $\gamma$  for the indicated time points and concentrations (n = 3).

**d**, Immunoblot analysis of cells in **(b)** co-cultured with CD3/CD28 activated splenic CD3<sup>+</sup> T cells at the indicated tumor: T-cell ratio. CD3 T only was used as a control (n = 3).

**e-g**, Immunoblot analysis of *Tsc2*<sup>-/-</sup> 105K cells **(e)**, *Tsc2*<sup>-/-</sup> TTJ cells **(f)**, and *TSC2*<sup>-/-</sup> 621-101 cells **(g)** treated with IFN- $\gamma$  for the indicated concentrations and time durations (n = 3).

**h,i**, Flow cytometry analysis of MHC-II expression on sh-NC, sh-B7-H3 (1), and sh-B7-H3 (2) *Tsc2*<sup>-/-</sup> 105K cells. Cells were treated with 10ng/ml of IFN- $\gamma$  for 48 hr. **(h)**. Mean fluorescent intensity (MFI) of MCH-II measured from each group of cells (n = 3) **(i)**. Means  $\pm$  SD, one-way ANOVA with Dunnett's multiple comparisons test.

**j-l**, Immunoblot analysis of *Tsc2*<sup>-/-</sup> 105K cells **(j)**, *Tsc2*<sup>-/-</sup> TTJ cells **(k)**, and *TSC2*<sup>-/-</sup> 621-101 cells **(l)** treated with IFN- $\gamma$  for the indicated concentrations and time durations (n = 3).

**m,n** Left panels: Representative flow cytometry plots showing the percentage of IFN- $\gamma$ /TNF- $\alpha$ -positive splenic CD8<sup>+</sup> T cells **(m)** or CD4<sup>+</sup> T cells **(n)** incubated with conditioned media isolated from cells in **(b)**. Middle and right panels: Quantification of the left panel. Means  $\pm$  SD, one-way ANOVA with Dunnett's multiple comparisons test (n = 3).

Source data are provided in the Source data file.

# Supplementary Fig. 6

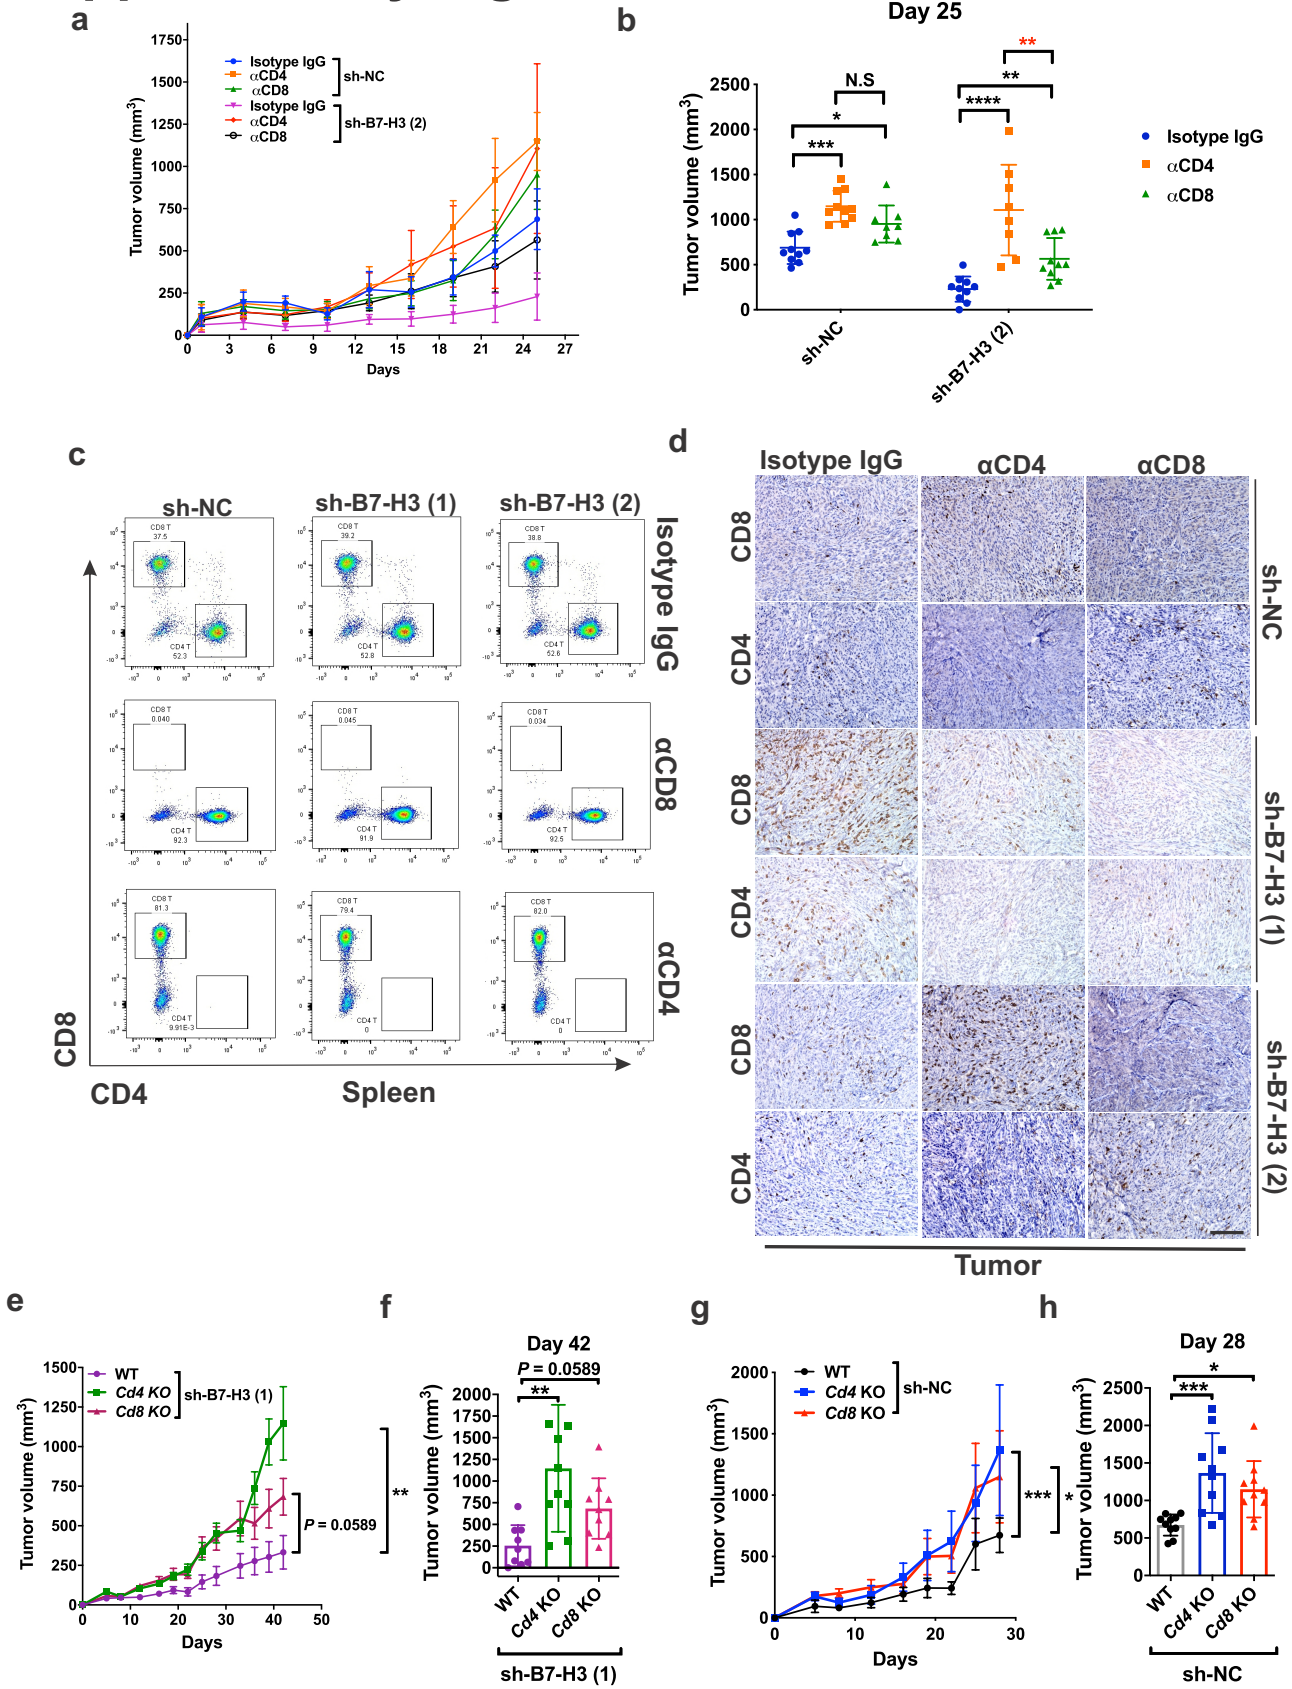

**Supplementary Fig. 6. Anti-tumor effect of B7-H3 inhibition depends more on CD4<sup>+</sup> T cells compared to CD8<sup>+</sup> T cells.**

**a**, Growth of sh-NC or sh-B7-H3 (2) *Tsc2*<sup>-/-</sup> 105K tumors treated with isotype control, α-CD4 or α-CD8 antibodies (n = 10 mice/group).

**b**, Tumor volume of (A) at 25-day post-cell injection. n = 10 tumors for sh-NC treated with isotype control, sh-NC treated with α-CD4, and sh-B7-H3 (2) treated with α-CD8, and n = 8 tumors for the remaining groups, means ± SD, two-way ANOVA with Holm-Sidak's multiple comparisons test, \*  $p < 0.05$ , \*\*  $p < 0.01$ , \*\*\*  $p < 0.001$ , \*\*\*\*  $p < 0.0001$ .

**c**, Representative flow cytometry plots showing that splenic CD8<sup>+</sup> and CD4<sup>+</sup> T cells were successfully depleted. (n = 5/group).

**d**, Representative immunohistochemical staining of CD8 and CD4 on tissue sections of sh-NC, sh-B7-H3 (1), or sh-B7-H3 (2) *Tsc2*<sup>-/-</sup> 105K tumors treated with the indicated antibody. Scale bar = 100 μm. (n = 5/group).

**e**, Growth of sh-B7-H3 (1) *Tsc2*<sup>-/-</sup> 105K tumors in WT, *Cd4* KO, or *Cd8* KO mice. n = 9 mice for WT, *Cd8* KO, n = 9 mice for *Cd4* KO, means ± SD, nonparametric Kruskal-Wallis test with Dunn's multiple comparisons test, \*\*  $p < 0.01$ .

**f**, Tumor volume of **e** at 42-day post-cell injection. n = 9 mice for WT, *Cd8* KO, n = 9 mice for *Cd4* KO, means ± SD, nonparametric Kruskal-Wallis test with Dunn's multiple comparisons test, \*\*  $p < 0.01$ .

**g**, Growth of sh-NC *Tsc2*<sup>-/-</sup> 105K tumors in WT, *Cd4* KO, or *Cd8* KO mice. n = 10 mice/group, means ± SD, nonparametric Kruskal-Wallis test with Dunn's multiple comparisons test, \*  $p < 0.05$ , \*\*\*  $p < 0.001$ .

**h**, Tumor volume of **g** at 28-day post-cell injection. n = 10 mice/group, means ± SD, nonparametric Kruskal-Wallis test with Dunn's multiple comparisons test, \*  $p < 0.05$ , \*\*\*  $p < 0.001$ .

Source data and exact p values are provided in the Source data file.

# Supplementary Fig. 7

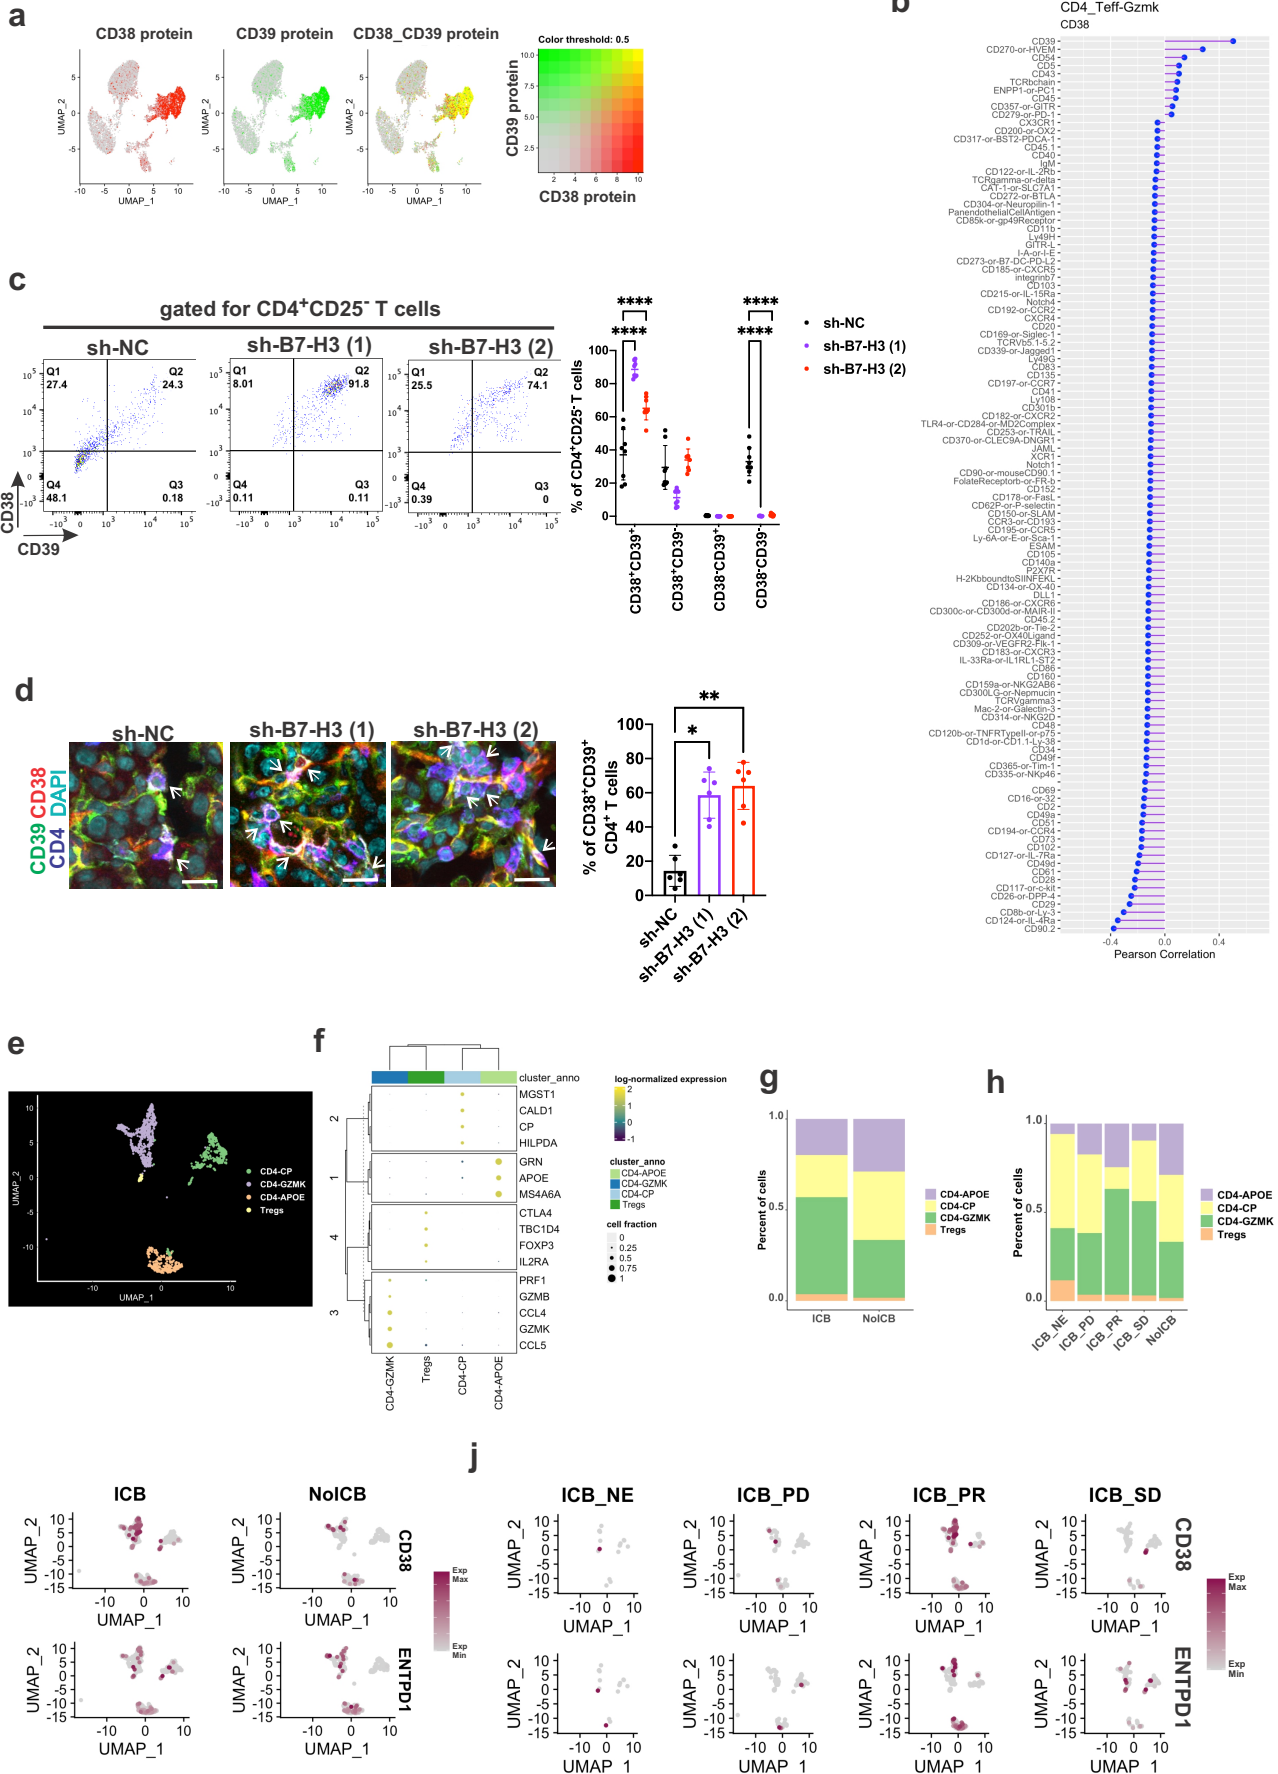

**Supplementary Fig. 7. Inhibition of B7-H3 increases the number of intratumoral CD38<sup>+</sup>CD39<sup>+</sup>CD4<sup>+</sup> TILs and analysis of CD4<sup>+</sup> T cells from advanced metastatic RCC patients.**

**a**, UMAP plots showing co-expression of CD38 and CD39 proteins in CD4<sub>Teff</sub>-Gzmk cells.

**b**, Spearman correlation analysis of CD38 protein expression versus other proteins detected by CITE-seq in CD4<sub>Teff</sub>-Gzmk cells.

**c**, Representative flow cytometry plots (left panel) and quantification of the percentage (right panel) of CD38 and CD39 on CD4<sup>+</sup>CD25<sup>-</sup> TILs in sh-NC, sh-B7-H3 (1), and sh-B7-H3 (2) *Tsc2*<sup>-/-</sup> 105K tumors. n = 8 mice/group, mean ± SD, two-way ANOVA with Holm-Sidak's multiple comparisons test, \*\*\*\*  $p < 0.0001$ .

**d**, Representative immunofluorescent images (left panel) and quantification (right panel) of CD38<sup>+</sup>CD39<sup>+</sup>CD4<sup>+</sup> TILs in lungs of WT mice with sh-NC, sh-B7-H3 (1), or sh-B7-H3 (2) *Tsc2*<sup>-/-</sup> 105K tumors. n = 6 mice/group, mean ± SD, nonparametric Kruskal-Wallis test with Dunn's multiple comparisons test, \*  $p < 0.05$ , \*\*  $p < 0.01$ . White arrows showing CD38<sup>+</sup>CD39<sup>+</sup>CD4<sup>+</sup> TILs.

**e**, UMAP plot of CD4<sup>+</sup> T cells combined from 8 metastatic RCC patients. 3 from kidneys, 3 from lymph nodes, 2 from visceral metastases.

**f**, Dotplot showing expression of selected genes from CD4<sup>+</sup> T cells in **e**.

**g,h**, Proportions of each CD4<sup>+</sup> T-cell clusters. ICB = Immune checkpoint blockade, NoICB = No Immune checkpoint blockade. ICB Response: PR = partial response, SD = stable disease, PD = progressive disease, and NE = not evaluable.

**i**, UMAP plots displaying expression of *CD38* and *ENTPD1* (CD39 gene name) in tumors according to their ICB exposure.

**j**, UMAP plots displaying expression of *CD38* and *ENTPD1* in tumors according to their ICB response. Source data and exact p values are provided in the Source data file.



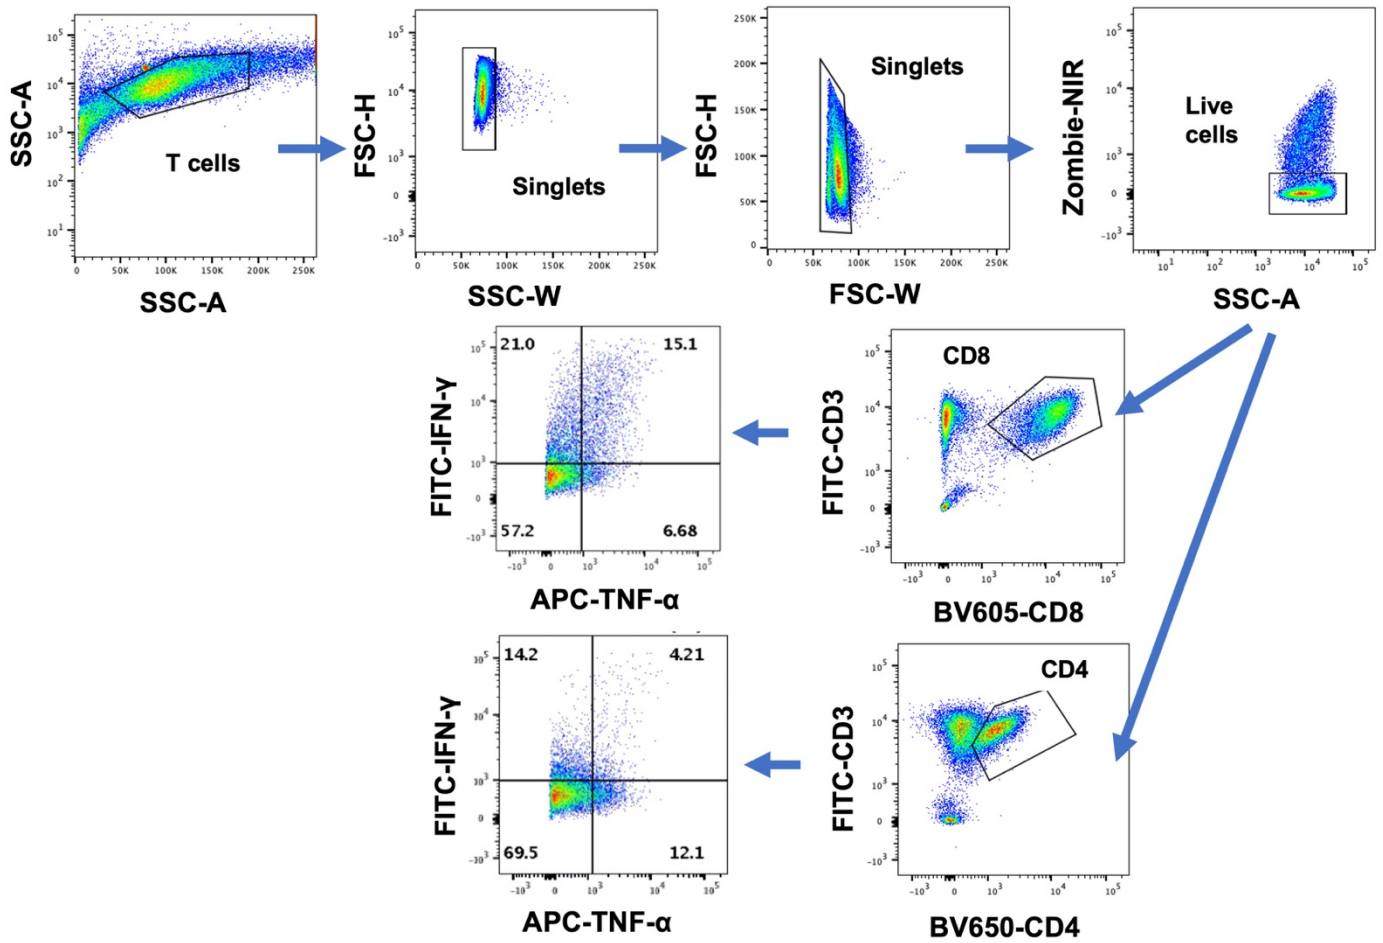

Supplementary Fig 8. Gating strategy for *in vitro* CD3/CD28 activated T-cell IFN- $\gamma$  and TNF- $\alpha$  analysis.

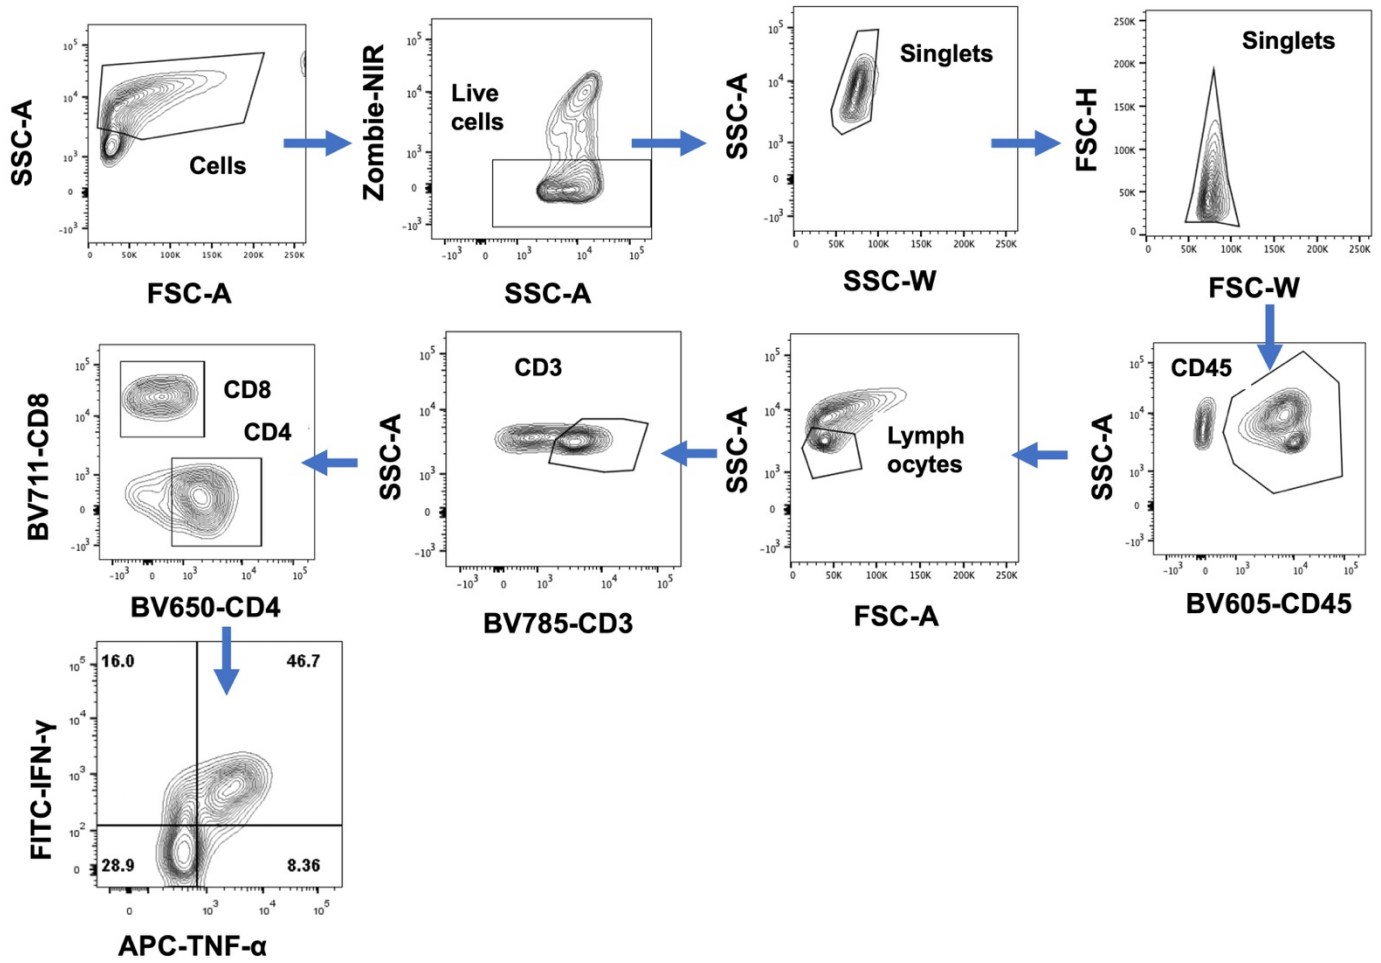

**Supplementary Fig 9.** Gating strategy for *ex vivo* tumor-infiltrating T-cell IFN- $\gamma$  and TNF- $\alpha$  analysis.

**Supplementary Table 1. List of antibodies used for CyTOF staining**

| Target       | Clone    | Supplier               | Dilution |
|--------------|----------|------------------------|----------|
| CD8 $\alpha$ | 53-6.7   | Lederer Lab CyTOF Core | 1:100    |
| CD4          | RM4-5    | Lederer Lab CyTOF Core | 1:100    |
| CD11c        | N418     | Lederer Lab CyTOF Core | 1:100    |
| TCR $\beta$  | H57-597  | Lederer Lab CyTOF Core | 1:100    |
| CD3          | 145-2C11 | Lederer Lab CyTOF Core | 1:100    |
| CD19         | 6D5      | Lederer Lab CyTOF Core | 1:100    |
| NK1.1        | PK136    | Lederer Lab CyTOF Core | 1:100    |
| CD45         | 30-F11   | Lederer Lab CyTOF Core | 1:100    |
| CD11b        | M1/70    | Lederer Lab CyTOF Core | 1:100    |
| Singlec-F    | E50-2440 | Lederer Lab CyTOF Core | 1:100    |
| Ly6G         | 1A8      | Lederer Lab CyTOF Core | 1:100    |
| Ly6C         | HK1.4    | Lederer Lab CyTOF Core | 1:100    |

**Supplementary Table 2. List of antibodies used for flow cytometry staining**

| Target        | Clone    | Supplier       | Dilution |
|---------------|----------|----------------|----------|
| CD45          | 30-F11   | BioLegend      | 1:100    |
| IFN $\gamma$  | XMG1.2   | BioLegend      | 1:50     |
| TNF- $\alpha$ | MP6-XT22 | BioLegend      | 1:100    |
| CD4           | RM4-5    | BioLegend      | 1:100    |
| CD8           | 53-6.7   | BioLegend      | 1:100    |
| CD3           | 17A2     | BioLegend      | 1:100    |
| CD38          | 90       | BioLegend      | 1:100    |
| CD39          | Y23-1185 | BD Biosciences | 1:100    |

**Supplementary Table 3. List of primers used for ChIP-qPCR**

| Primer                 | FW                      | RV                     |
|------------------------|-------------------------|------------------------|
| Cd276 promoter (mouse) | GAGTCCCTTCTTTTCCTTGAGTC | CCCTTCACCTGTGTTTGTATCT |

**Supplementary Table 4. List of siRNAs used for transfection**

| <b>siRNA</b>             | <b>Cat #</b>     | <b>Company</b> |
|--------------------------|------------------|----------------|
| SMARTpools mTOR siRNA    | L-065427-00-0005 | Dharmacon      |
| SMARTpools Raptor siRNA  | L-058754-01-0005 | Dharmacon      |
| SMARTpools Rictor siRNA  | L-064598-01-0005 | Dharmacon      |
| SMARTpools S6K siRNA     | L-040893-00-0005 | Dharmacon      |
| SMARTpools 4E-BP1 siRNA  | L-058681-01-0005 | Dharmacon      |
| SMARTpools YY2 siRNA     | L-171481-00-0005 | Dharmacon      |
| SMARTpools control siRNA | D-001810-10-05   | Dharmacon      |

**Supplementary Table 5. List of probes used for qRT-PCR**

| <b>Probe</b>  | <b>Cat #</b>  | <b>Company</b>          |
|---------------|---------------|-------------------------|
| Cd276 (mouse) | Mm00506020_m1 | ThermoFisher Scientific |
| CD276 (human) | Hs00987207_m1 | ThermoFisher Scientific |
| Yy2 (mouse)   | Mm03059489_sH | ThermoFisher Scientific |
| YY2 (human)   | Hs02597954_sH | ThermoFisher Scientific |
| Yy1 (mouse)   | Mm00456392_m1 | ThermoFisher Scientific |
| YY1 (human)   | Hs00998747_m1 | ThermoFisher Scientific |
