# Supplementary material for: mTORC1 upregulates B7-H3/CD276 to inhibit antitumor T cells and drive tumor immune evasion
Source: PubMed Central journal article supplement (PMC9984496; doi:10.1038/s41467-023-36881-7), 2023-03-03
Supplement: 41467_2023_36881_MOESM3_ESM.pdf [file 41467_2023_36881_MOESM3_ESM.pdf]

## **Description of Additional Supplementary Files**

### **Supplementary Data 1: RNAseq B7-H3 KD vs Ctrl ex vivo tumor cells.**

Differentially expressed genes in sorted B7-H3 KD tumor cells compared to Ctrl tumor cells. n = 3/group.
