# Supplementary material for: mTORC1 upregulates B7-H3/CD276 to inhibit antitumor T cells and drive tumor immune evasion
Source: PubMed Central journal article supplement (PMC9984496; doi:10.1038/s41467-023-36881-7), 2023-03-03
Supplement: 41467_2023_36881_MOESM5_ESM.pdf [file 41467_2023_36881_MOESM5_ESM.pdf]

## Reporting Summary

Nature Portfolio wishes to improve the reproducibility of the work that we publish. This form provides structure for consistency and transparency in reporting. For further information on Nature Portfolio policies, see our [Editorial Policies](#) and the [Editorial Policy Checklist](#).

### Statistics

For all statistical analyses, confirm that the following items are present in the figure legend, table legend, main text, or Methods section.

n/a Confirmed

- The exact sample size ( $n$ ) for each experimental group/condition, given as a discrete number and unit of measurement
- A statement on whether measurements were taken from distinct samples or whether the same sample was measured repeatedly
- The statistical test(s) used AND whether they are one- or two-sided  
*Only common tests should be described solely by name; describe more complex techniques in the Methods section.*
- A description of all covariates tested
- A description of any assumptions or corrections, such as tests of normality and adjustment for multiple comparisons
- A full description of the statistical parameters including central tendency (e.g. means) or other basic estimates (e.g. regression coefficient) AND variation (e.g. standard deviation) or associated estimates of uncertainty (e.g. confidence intervals)
- For null hypothesis testing, the test statistic (e.g.  $F$ ,  $t$ ,  $r$ ) with confidence intervals, effect sizes, degrees of freedom and  $P$  value noted  
*Give  $P$  values as exact values whenever suitable.*
- For Bayesian analysis, information on the choice of priors and Markov chain Monte Carlo settings
- For hierarchical and complex designs, identification of the appropriate level for tests and full reporting of outcomes
- Estimates of effect sizes (e.g. Cohen's  $d$ , Pearson's  $r$ ), indicating how they were calculated

*Our web collection on [statistics for biologists](#) contains articles on many of the points above.*

### Software and code

Policy information about [availability of computer code](#)

Data collection

Confocal images were captured using Olympus FV10-FSW software package (v 4.1). IHC images were captured using Keyence BZ-X800 microscope and its integrated viewer. Chemiluminescent images were captured using Syngene G-Box and ThermoFisher iBright 1500 imagers. CD276 reporter dual luciferase activity was analyzed using Biotek Synergy HT running Gen5 v.11.5 software. Gene expression by RT-PCR was analyzed using AppliedBiosystems Step One Plus real time PCR system (v2.3). RNAseq data was collected using Illumina NextSeq 550. CITE-seq data was collected using NovaSeq 6000.

Data analysis

Image J (v 2.0.0) was used for image analysis. GraphPad Prism (v6.0 & v.9.3.0) was used for statistical analysis. R package Seurat (v 4.0.2), CellRanger (v 6.0.1), GSVA (v 1.36.3), and DESeq2 (v 1.38.2) were used for data analysis. Genomatix MatInspector software (<https://www.genomatix.de>) and JASPAR (<https://jaspar.genereg.net>) were used to identify transcription factors that bind Mouse and human CD276 promoter region.

For manuscripts utilizing custom algorithms or software that are central to the research but not yet described in published literature, software must be made available to editors and reviewers. We strongly encourage code deposition in a community repository (e.g. GitHub). See the Nature Portfolio [guidelines for submitting code & software](#) for further information.

## Data

Policy information about [availability of data](#)

All manuscripts must include a [data availability statement](#). This statement should provide the following information, where applicable:

- Accession codes, unique identifiers, or web links for publicly available datasets
- A description of any restrictions on data availability
- For clinical datasets or third party data, please ensure that the statement adheres to our [policy](#)

The raw bulk RNA-seq data generated in this study have been deposited in the GEO database under accession code GSE213626 (<https://www.ncbi.nlm.nih.gov/geo/query/acc.cgi?acc=GSE213626>). The raw CITE-seq data generated in this study have been deposited under accession code GSE213939 (<https://www.ncbi.nlm.nih.gov/geo/query/acc.cgi?acc=GSE213939>). The TCGA publicly available data are available in the FireBrowse (<http://firebrowse.org>). All other data supporting the finding of this study are available within the article and the data generated in this study are provided in the Supplementary Information and Source data file. Source data are provided with this paper.

## Human research participants

Policy information about [studies involving human research participants and Sex and Gender in Research](#).

|                             |     |
|-----------------------------|-----|
| Reporting on sex and gender | N/A |
| Population characteristics  | N/A |
| Recruitment                 | N/A |
| Ethics oversight            | N/A |

Note that full information on the approval of the study protocol must also be provided in the manuscript.

## Field-specific reporting

Please select the one below that is the best fit for your research. If you are not sure, read the appropriate sections before making your selection.

- Life sciences       Behavioural & social sciences       Ecological, evolutionary & environmental sciences

For a reference copy of the document with all sections, see [nature.com/documents/nr-reporting-summary-flat.pdf](https://www.nature.com/documents/nr-reporting-summary-flat.pdf)

## Life sciences study design

All studies must disclose on these points even when the disclosure is negative.

|                 |                                                                                                                                                                                                                                                                                                                                                                                             |
|-----------------|---------------------------------------------------------------------------------------------------------------------------------------------------------------------------------------------------------------------------------------------------------------------------------------------------------------------------------------------------------------------------------------------|
| Sample size     | For in vitro studies, we used empirical n=3 replicates. Based on large effect size we observed in in vitro studies, we determined that for in vivo study, n=6-10 can achieve a statistic power of 0.8 to detect difference between groups using two-sided t-test at significance of 0.05 at any time points. The exact n for each experiment was described in corresponding figure legends. |
| Data exclusions | For CITE-seq analysis, cells were filtered from downstream analysis with the criteria of < 200 genes or > 3000 genes detected and > 0.05 fraction of mitochondrial gene.                                                                                                                                                                                                                    |
| Replication     | All experiments in this study were repeated with at least in 3 biological replicates. All replicates showed similar results.                                                                                                                                                                                                                                                                |
| Randomization   | All mice and cell culture experiments were randomly assigned to different groups.                                                                                                                                                                                                                                                                                                           |
| Blinding        | All data acquisition and analysis in this study were performed in a blinded way.                                                                                                                                                                                                                                                                                                            |

## Reporting for specific materials, systems and methods

We require information from authors about some types of materials, experimental systems and methods used in many studies. Here, indicate whether each material, system or method listed is relevant to your study. If you are not sure if a list item applies to your research, read the appropriate section before selecting a response.

## Materials &amp; experimental systems

| n/a                                 | Involved in the study                                           |
|-------------------------------------|-----------------------------------------------------------------|
| <input type="checkbox"/>            | <input checked="" type="checkbox"/> Antibodies                  |
| <input type="checkbox"/>            | <input checked="" type="checkbox"/> Eukaryotic cell lines       |
| <input checked="" type="checkbox"/> | <input type="checkbox"/> Palaeontology and archaeology          |
| <input type="checkbox"/>            | <input checked="" type="checkbox"/> Animals and other organisms |
| <input checked="" type="checkbox"/> | <input type="checkbox"/> Clinical data                          |
| <input checked="" type="checkbox"/> | <input type="checkbox"/> Dual use research of concern           |

## Methods

| n/a                                 | Involved in the study                              |
|-------------------------------------|----------------------------------------------------|
| <input checked="" type="checkbox"/> | <input type="checkbox"/> ChIP-seq                  |
| <input type="checkbox"/>            | <input checked="" type="checkbox"/> Flow cytometry |
| <input checked="" type="checkbox"/> | <input type="checkbox"/> MRI-based neuroimaging    |

## Antibodies

## Antibodies used

## For in vivo treatment:

InVivoMab anti-mouse B7-H3 (clone MJ18) (BioXCell, BE0124, Rat, 300ug)  
 InVivoMab Rat IgG1 isotype control (HRPN) (BioXCell, BE0088, Rat, 300ug)  
 InVivoMab anti-mouse CD4 (clone GK1.5) (BioXCell, BE0003, Rat, 200ug)  
 InVivoMab anti-mouse CD8 (clone YTS 169.4) (BioXCell, BE0117, Rat, 200ug)  
 InVivoMab rat IgG2b isotype (LTF-2) (BioXCell, BE0090, Rat, 200ug)  
 InVivoMab rat IgG1 isotype (HRPN) (BioXCell, BE0088, Rat, 200ug)

## For WB/IHC/IF:

Anti-Phospho-p70 S6 Kinase T389 (Cell Signaling Technology, 9234, Rb, 1:1000)  
 Anti-p70 S6 Kinase (Cell Signaling Technology, 2708, Rb, 1:1000)  
 Anti-TSC2 (Cell Signaling Technology, 4308, Rb, 1:1000)  
 Anti-Phospho-S6 S235/236 (Cell Signaling Technology, 2211, Rb, 1:1000)  
 Anti-S6 (Cell Signaling Technology, 2217, Rb, 1:1000)  
 Anti-mTOR (Cell Signaling Technology, 2983, Rb, 1:1000)  
 Anti-Raptor (Cell Signaling Technology, 2280, Rb, 1:1000)  
 Anti-Rictor (Cell Signaling Technology, 2114, Rb, 1:1000)  
 Anti-Phospho-Akt S473 (Cell Signaling Technology, 4060, Rb, 1:1000)  
 Anti-Akt (Cell Signaling Technology, 4685, Rb, 1:1000)  
 Anti-GAPDH (Cell Signaling Technology, 2118, Rb, 1:1000)  
 Anti-CREB (Cell Signaling Technology, 4820, Rb, 1:1000)  
 Anti-STAT1 (Cell Signaling Technology, 14994, Rb, 1:1000)  
 Anti-p-STAT1 (Tyr 701) (Cell Signaling Technology, 9167, Rb, 1:1000)  
 Anti-B7-H3 (Human) (Cell Signaling Technology, 14058, Rb, 1:1000)  
 Anti-YY1 (Cell Signaling Technology, 46395, Rb, 1:1000)  
 Anti-HA-tag (Cell Signaling Technology, 3724, Rb, 1:1000)  
 Anti-Phospho-substrate (RXXS\*/T\*) (110B7E) (Cell Signaling Technology, 9614, Rb, 1:1000)  
 Anti-E-cadherin (Cell Signaling Technology, 14472, Rb, 1:400)  
 Anti-F4/80 (Cell Signaling Technology, 70076, Rb, 1:500)  
 Anti-MHC-II (LSBio, LS-C204829, Rat, 1:100)  
 Anti- $\beta$ -actin (Sigma, A1978, Mouse, 1:1000)  
 Anti-B7-H3 Mouse (R&D Systems, AF1397, Goat, 1:1000)  
 Anti-YY2 (A-5) Mouse (Santa Cruz, sc-377008, Mouse, 1:1000)  
 Anti-YY2 (C-10) Human (Santa Cruz, sc-374455, Mouse, 1:1000)  
 Anti-ClITA (Santa Cruz, sc-13556, Mouse, 1:1000)  
 Anti-CD31 (Abcam, ab182981, Rb, 1:500)  
 Anti-GFP (Abcam, ab6556, Rb, 1:1000)  
 Anti-CD4 (eBioscience, 14-9766-82, Rat, 1:1000)  
 Anti-CD8 (eBioscience, 14-0808-82, Rat, 1:1000)  
 Anti-rabbit IgG (Vector Laboratories, MP7451)  
 Anti-mouse IgG (Vector Laboratories, MP7452)  
 Anti-CD38 Alexa Fluor 594 (90) Mouse (BioLegend, 102725, Rat, 1:100)  
 Anti-CD39 (EPR22507-48) Mouse (Abcam, Ab227840, Rb, 1:250)  
 Anti-Myc Tag (Cell Signaling Technology, 2276, Mouse, 1:1000)  
 Anti-DYKDDDDK Tag (Cell Signaling Technology, 8146, Mouse, 1:1000)  
 goat anti-rabbit IgG H&L (Alexa Fluor 488) (ThermoFisher, A-11008, 1:500)  
 goat anti-rabbit IgG H&L (Alexa Fluor 594) (ThermoFisher, A-11012, 1:500)  
 goat anti-rabbit IgG H&L (Alexa Fluor 647) (ThermoFisher, A-21245, 1:500)

## For Flow Cytometry/CyTOF:

Anti-Ly6G PerCP (1A8) Mouse (BioLegend, 127654, Rat, 1:100)  
 Anti-CD11c BV510 (N418) Mouse (BioLegend, 117338, Rat 1:100)  
 Anti-Ly6C BV605 (HK1.4) Mouse (BioLegend, 128036, Rat) 1:100  
 Anti-CD45 BV711 (30-F11) Mouse (BioLegend, 103147, Rat 1:100)

Anti-CD45 BV605 (30-F11) Mouse (BioLegend, 103140, Rat 1:100)  
 Anti-CD11b BV785 (M1/70) Mouse (BioLegend, 101243, Rat 1:100)  
 Anti-IFN- $\gamma$  FITC (XMG1.2) Mouse (BioLegend, 505806, Rat, 1:50)  
 Anti-TNF- $\alpha$  APC (MP6-XT22) Mouse (BioLegend, 506308, Rat, 1:100)  
 Anti-CD4 BV650 (RM4-5) Mouse (BioLegend, 100546, Rat, 1:100)  
 Anti-CD8 BV711 (53-6.7) Mouse (BioLegend, 100748, Rat, 1:100)  
 Anti-CD3 BV785 (17A2) Mouse (BioLegend, 100232, Rat, 1:100)  
 Anti-CD3 FITC (17A2) Mouse (BioLegend, 100204, Rat, 1:100)  
 Anti-CD4 Alexa Fluor 647 (GK1.5) Mouse (BioLegend, 100424, Rat, 1:100)  
 Anti-CD38 BV421 (90) Mouse (BioLegend, 102732, Rat, 1:100)  
 Anti-Rat IgG2b, k Isotype (BioLegend, 400601, Rat, 1:100)  
 Anti-I-A/I-E (M5/114.15.2) (BioLegend, 107601, Rat, 1:100)  
 Anti-CD39 PE (Y23-1185) Mouse (BD Biosciences, 567104, Rat, 1:100)  
 Anti-CD8 $\alpha$  142Nd (53-6.7) Mouse (Lederer Lab CyTOF Core, 1:100)  
 Anti-CD4 145Nd (RM4-5) Mouse (Lederer Lab CyTOF Core, 1:100)  
 Anti-CD11c 146Nd (N418) Mouse (Lederer Lab CyTOF Core, 1:100)  
 Anti-TCR $\beta$  150Nd (H57-597) Mouse (Lederer Lab CyTOF Core, 1:100)  
 Anti-CD3 152Sm (145-2C11) Mouse (Lederer Lab CyTOF Core, 1:100)  
 Anti-CD19 156Gd (6D5) Mouse (Lederer Lab CyTOF Core, 1:100)  
 Anti-NK1.1 163 Dy (PK136) Mouse (Lederer Lab CyTOF Core, 1:100)  
 Anti-CD45 165Ho (30-F11) Mouse (Lederer Lab CyTOF Core, 1:100)  
 Anti-Anti-CD11b 169Tm (M1/70) Mouse (Lederer Lab CyTOF Core, 1:100)  
 Anti-Singlec-F 170Er (E50-2440) Mouse (Lederer Lab CyTOF Core, 1:100)  
 Anti-Ly6G 158Gd (1A8) Mouse (Lederer Lab CyTOF Core, 1:100)  
 Anti-Ly6C 151Eu (HK1.4) Mouse (Lederer Lab CyTOF Core, 1:100)

For CITE-seq:

TotalSeq-A lyophilized antibodies Mouse (BioLegend, 99833, 1 vial per 5 x 10<sup>5</sup> cell)  
 TrueStain FcX Antibody (BioLegend, 101320, Rat, 1:100)

#### Validation

All antibodies used in this study are commercially available and all are validated by the vendors for the specific assays and species used; the validation data is available on the vendors website.

- InVivomAb anti-mouse B7-H3 (clone MJ18) (BioXCell, BE0124, Rat)  
<https://bioxcell.com/invivomab-anti-mouse-cd276-b7-h3-be0124>  
 The manufacturer has validated this antibody for in vivo use in species mouse.
- InVivoMab Rat IgG1 isotype control (HRPN) (BioXCell, BE0088, Rat)  
<https://bioxcell.com/invivomab-rat-igg1-isotype-control-anti-horseradish-peroxidase-be0088>  
 The manufacturer has validated this antibody for in vivo use in species mouse.
- InVivomAb anti-mouse CD4 (clone GK1.5) (BioXCell, BE0003, Rat)  
<https://bioxcell.com/invivomab-anti-mouse-cd4-be0003-1>  
 The manufacturer has validated this antibody for in vivo use in species mouse.
- InVivomAb anti-mouse CD8 (clone YTS 169.4) (BioXCell, BE0117, Rat)  
<https://bioxcell.com/invivomab-anti-mouse-cd8a-be0117>  
 The manufacturer has validated this antibody for in vivo use in species mouse.
- InVivomAb rat IgG2b isotype (LTF-2) (BioXCell, BE0090, Rat)  
<https://bioxcell.com/invivomab-rat-igg2b-isotype-control-anti-keyhole-limpet-hemocyanin-be0090>  
 The manufacturer has validated this antibody for in vivo use in species mouse.
- InVivomAb rat IgG1 isotype (HRPN) (BioXCell, BE0088, Rat)  
<https://bioxcell.com/invivomab-rat-igg1-isotype-control-anti-horseradish-peroxidase-be0088>  
 The manufacturer has validated this antibody for in vivo use in species mouse.
- Anti-Phospho-p70 S6 Kinase T389 (Cell Signaling Technology, 9234, Rb)  
<https://www.cellsignal.com/product/productDetail.jsp?productId=9234>  
 The manufacturer has validated this antibody for WB in the species human and mouse.
- Anti-p70 S6 Kinase (Cell Signaling Technology, 2708, Rb)  
<https://www.cellsignal.com/product/productDetail.jsp?productId=2708>  
 The manufacturer has validated this antibody for WB in the species human and mouse.
- Anti-TSC2 (Cell Signaling Technology, 4308, Rb)  
<https://www.cellsignal.com/product/productDetail.jsp?productId=4308>  
 The manufacturer has validated this antibody for WB in the species human and mouse.
- Anti-Phospho-S6 S235/236 (Cell Signaling Technology, 2211, Rb)  
<https://www.cellsignal.com/product/productDetail.jsp?productId=2211>

- The manufacturer has validated this antibody for WB in the species human and mouse.
11. Anti-S6 (Cell Signaling Technology, 2217, Rb)  
<https://www.cellsignal.com/product/productDetail.jsp?productId=2217>  
 The manufacturer has validated this antibody for WB in the species human and mouse.
12. Anti-mTOR (Cell Signaling Technology, 2983, Rb)  
<https://www.cellsignal.com/product/productDetail.jsp?productId=2983>  
 The manufacturer has validated this antibody for WB in the species human and mouse.
13. Anti-Raptor (Cell Signaling Technology, 2280, Rb)  
<https://www.cellsignal.com/product/productDetail.jsp?productId=2280>  
 The manufacturer has validated this antibody for WB in the species human and mouse.
14. Anti-Rictor (Cell Signaling Technology, 2114, Rb)  
<https://www.cellsignal.com/product/productDetail.jsp?productId=2114>  
 The manufacturer has validated this antibody for WB in the species human and mouse.
15. Anti-Phospho-Akt S473 (Cell Signaling Technology, 4060, Rb)  
<https://www.cellsignal.com/product/productDetail.jsp?productId=4060>  
 The manufacturer has validated this antibody for WB in the species human and mouse.
16. Anti-Akt (Cell Signaling Technology, 4685, Rb)  
<https://www.cellsignal.com/product/productDetail.jsp?productId=4685>  
 The manufacturer has validated this antibody for WB in the species human and mouse.
17. Anti-GAPDH (Cell Signaling Technology, 2118, Rb)  
<https://www.cellsignal.com/product/productDetail.jsp?productId=2118>  
 The manufacturer has validated this antibody for WB in the species human and mouse.
18. Anti-CREB (Cell Signaling Technology, 4820, Rb)  
<https://www.cellsignal.com/product/productDetail.jsp?productId=4820>  
 The manufacturer has validated this antibody for WB in the species human and mouse.
19. Anti-STAT1 (Cell Signaling Technology, 14994, Rb)  
<https://www.cellsignal.com/product/productDetail.jsp?productId=14994>  
 The manufacturer has validated this antibody for WB/IHC in the species human and mouse.
20. Anti-p-STAT1 (Tyr 701) (Cell Signaling Technology, 9167, Rb)  
<https://www.cellsignal.com/product/productDetail.jsp?productId=9167>  
 The manufacturer has validated this antibody for WB in the species human and mouse.
21. Anti-B7-H3 (Human) (Cell Signaling Technology, 14058, Rb)  
<https://www.cellsignal.com/product/productDetail.jsp?productId=14058>  
 The manufacturer has validated this antibody for WB/IHC in the species human.
22. Anti-YY1 (Cell Signaling Technology, 46395, Rb)  
<https://www.cellsignal.com/product/productDetail.jsp?productId=46395>  
 The manufacturer has validated this antibody for WB in the species human.
23. Anti-HA-tag (Cell Signaling Technology, 3724, Rb)  
<https://www.cellsignal.com/product/productDetail.jsp?productId=3724>  
 The manufacturer has validated this antibody for WB in the species human and mouse.
24. Anti-Phospho-substrate (RXXS\*/T\*) (110B7E) (Cell Signaling Technology, 9614, Rb)  
<https://www.cellsignal.com/product/productDetail.jsp?productId=9614>  
 The manufacturer has validated this antibody for WB in the species human and mouse.
25. Anti-E-cadherin (Cell Signaling Technology, 14472, Rb)  
[https://www.cellsignal.com/products/primary-antibodies/e-cadherin-4a2-mouse-mab/14472?\\_=1673373457991&Ntt=e-cad&thead=true](https://www.cellsignal.com/products/primary-antibodies/e-cadherin-4a2-mouse-mab/14472?_=1673373457991&Ntt=e-cad&thead=true)  
 The manufacturer has validated this antibody for WB/IHC in the species human and mouse.
26. Anti-F4/80 (Cell Signaling Technology, 70076, Rb)  
<https://www.cellsignal.com/product/productDetail.jsp?productId=70076>  
 The manufacturer has validated this antibody for IHC in the species mouse.
27. Anti-MHC-II (LSBio, LS-C204829, Rat)  
<https://www.lsbio.com/antibodies/mhc-class-ii-i-a-antibody-i-e-antibody-clone-m5-114-azide-free-flow-ihc-ip-wb-western-ls-c204829/213397>  
 The manufacturer has validated this antibody for WB/IHC in the species mouse.
28. Anti- $\beta$ -actin (Sigma, A1978, Mouse)  
[https://www.sigmaaldrich.com/US/en/product/sigma/a1978?gclid=Cj0KCQjAtvSdBhDOARIsAPf8oNm0z020fBdVs6QUJpkfnGVpQk00P4YCYtCze0LI2RtMM8FH4gSED8aAtZ2EALw\\_wcB&gclid=aw.d5](https://www.sigmaaldrich.com/US/en/product/sigma/a1978?gclid=Cj0KCQjAtvSdBhDOARIsAPf8oNm0z020fBdVs6QUJpkfnGVpQk00P4YCYtCze0LI2RtMM8FH4gSED8aAtZ2EALw_wcB&gclid=aw.d5)  
 The manufacturer has validated this antibody for WB in the species human and mouse.
29. Anti-B7-H3 Mouse (R&D Systems, AF1397, Goat)  
[https://www.rndsystems.com/products/mouse-b7-h3-antibody\\_af1397](https://www.rndsystems.com/products/mouse-b7-h3-antibody_af1397)  
 The manufacturer has validated this antibody for WB in the species mouse.
30. Anti-YY2 (A-5) Mouse (Santa Cruz, sc-377008, Mouse)  
<https://www.scbt.com/p/yy2-antibody-a-5>  
 The manufacturer has validated this antibody for WB in the species mouse.
31. Anti-YY2 (C-10) Human (Santa Cruz, sc-374455, Mouse)  
<https://www.scbt.com/p/yy2-antibody-c-10>  
 The manufacturer has validated this antibody for WB in the species human.
32. Anti-ClITA (Santa Cruz, sc-13556, Mouse)

<https://www.scbt.com/p/ciita-antibody-7-1h>

The manufacturer has validated this antibody for WB in the species human and mouse.

33. Anti-CD31 (Abcam, ab182981, Rb)

<https://www.abcam.com/cd31-antibody-epr17259-ab182981.html>

The manufacturer has validated this antibody for IHC in the species human and mouse.

34. Anti-GFP (Abcam, ab6556, Rb)

<https://www.abcam.com/gfp-antibody-ab6556.html>

The manufacturer has validated this antibody for WB in the species human and mouse.

35. Anti-CD4 (eBioscience, 14-9766-82, Rat)

<https://www.thermofisher.com/antibody/product/CD4-Antibody-clone-4SM95-Monoclonal/14-9766-82>

The manufacturer has validated this antibody for IHC in the species mouse.

36. Anti-CD8 (eBioscience, 14-0808-82, Rat)

<https://www.thermofisher.com/antibody/product/CD8a-Antibody-clone-4SM15-Monoclonal/14-0808-82>

The manufacturer has validated this antibody for IHC in the species mouse.

37. Anti-rabbit IgG (Vector Laboratories, MP7451)

<https://vectorlabs.com/products/enzyme-polymer/impress-hrp-goat-anti-rabbit-igg-kit>

The manufacturer has validated this antibody for IHC in the species human and mouse.

38. Anti-mouse IgG (Vector Laboratories, MP7452)

<https://vectorlabs.com/products/enzyme-polymer/impress-hrp-goat-anti-mouse-igg-kit>

The manufacturer has validated this antibody for IHC in the species human and mouse.

39. Anti-CD38 Alexa Fluor 594 (90) Mouse (BioLegend, 102725, Rat)

<https://www.biolegend.com/fr-fr/products/alexa-fluor-594-anti-mouse-cd38-antibody-12447?GroupID=BLG247>

The manufacturer has validated this antibody for IHC in the species mouse.

40. Anti-CD39 (EPR22507-48) Mouse (Abcam, Ab227840, Rb)

<https://www.abcam.com/cd39-antibody-epr22507-48-ab227840.html>

The manufacturer has validated this antibody for IHC in the species mouse.

41. Anti-Myc Tag (Cell Signaling Technology, 2276, Mouse)

<https://www.cellsignal.com/products/primary-antibodies/myc-tag-9b11-mouse-mab/2276>

The manufacturer has validated this antibody for WB in the species human and mouse.

42. Anti-DYKDDDDK Tag (Cell Signaling Technology, 8146, Mouse)

<https://www.cellsignal.com/products/primary-antibodies/dykdddk-tag-9a3-mouse-mab-binds-to-same-epitope-as-sigma-s-anti-flag-m2-antibody/8146>

The manufacturer has validated this antibody for WB in the species human and mouse.

43. goat anti-rabbit IgG H&L (Alexa Fluor 488) (ThermoFisher, A-11008)

<https://www.thermofisher.com/antibody/product/Goat-anti-Rabbit-IgG-H-L-Cross-Adsorbed-Secondary-Antibody-Polyclonal/A-11008>

The manufacturer has validated this antibody for IF in the species human and mouse.

44. goat anti-rabbit IgG H&L (Alexa Fluor 594) (ThermoFisher, A-11012)

<https://www.thermofisher.com/antibody/product/Goat-anti-Rabbit-IgG-H-L-Cross-Adsorbed-Secondary-Antibody-Polyclonal/A-11012>

The manufacturer has validated this antibody for IF in the species human and mouse.

45. goat anti-rabbit IgG H&L (Alexa Fluor 647) (ThermoFisher, A-21245)

<https://www.thermofisher.com/antibody/product/Goat-anti-Rabbit-IgG-H-L-Highly-Cross-Adsorbed-Secondary-Antibody-Polyclonal/A-21245>

The manufacturer has validated this antibody for IF in the species human and mouse.

46. Anti-Ly6G PerCP (1A8) Mouse (BioLegend, 127654, Rat)

<https://www.biolegend.com/nl-nl/products/percp-anti-mouse-ly-6g-antibody-13351>

The manufacturer has validated this antibody for FC in the species mouse.

47. Anti-CD11c BV510 (N418) Mouse (BioLegend, 117338, Rat)

<https://www.biolegend.com/nl-nl/products/brilliant-violet-510-anti-mouse-cd11c-antibody-8491>

The manufacturer has validated this antibody for FC in the species mouse.

48. Anti-Ly6C BV605 (HK1.4) Mouse (BioLegend, 128036, Rat)

<https://www.biolegend.com/nl-nl/products/brilliant-violet-605-anti-mouse-ly-6c-antibody-8727>

The manufacturer has validated this antibody for FC in the species mouse.

49. Anti-CD45 BV711 (30-F11) Mouse (BioLegend, 103147, Rat)

<https://www.biolegend.com/nl-nl/products/brilliant-violet-711-anti-mouse-cd45-antibody-10439>

The manufacturer has validated this antibody for FC in the species mouse.

50. Anti-CD45 BV605 (30-F11) Mouse (BioLegend, 103140, Rat)

<https://www.biolegend.com/nl-nl/products/brilliant-violet-605-anti-mouse-cd45-antibody-8721>

The manufacturer has validated this antibody for FC in the species mouse.

51. Anti-CD11b BV785 (M1/70) Mouse (BioLegend, 101243, Rat)

<https://www.biolegend.com/nl-nl/products/brilliant-violet-785-anti-mouse-human-cd11b-antibody-7958>

The manufacturer has validated this antibody for FC in the species mouse.

52. Anti-IFN- $\gamma$  FITC (XMG1.2) Mouse (BioLegend, 505806, Rat)

<https://www.biolegend.com/nl-nl/products/fic-anti-mouse-ifn-gamma-antibody-995>

The manufacturer has validated this antibody for FC in the species mouse.

53. Anti-TNF- $\alpha$  APC (MP6-XT22) Mouse (BioLegend, 506308, Rat)

<https://www.biolegend.com/nl-nl/products/apc-anti-mouse-tnf-alpha-antibody-975>

The manufacturer has validated this antibody for FC in the species mouse.

54. Anti-CD4 BV650 (RM4-5) Mouse (BioLegend, 100546, Rat)  
<https://www.biolegend.com/nl-nl/products/brilliant-violet-650-anti-mouse-cd4-antibody-7634>  
 The manufacturer has validated this antibody for FC in the species mouse.
55. Anti-CD8 BV711 (53-6.7) Mouse (BioLegend, 100748, Rat)  
<https://www.biolegend.com/nl-nl/products/brilliant-violet-711-anti-mouse-cd8a-antibody-7926>  
 The manufacturer has validated this antibody for FC in the species mouse.
56. Anti-CD3 BV785 (17A2) Mouse (BioLegend, 100232, Rat)  
<https://www.biolegend.com/nl-nl/products/brilliant-violet-785-anti-mouse-cd3-antibody-7953>  
 The manufacturer has validated this antibody for FC in the species mouse.
57. Anti-CD3 FITC (17A2) Mouse (BioLegend, 100204, Rat)  
<https://www.biolegend.com/nl-nl/products/fitc-anti-mouse-cd3-antibody-45>  
 The manufacturer has validated this antibody for FC in the species mouse.
58. Anti-CD4 Alexa Fluor 647 (GK1.5) Mouse (BioLegend, 100424, Rat)  
<https://www.biolegend.com/nl-nl/products/alexa-fluor-647-anti-mouse-cd4-antibody-2694>  
 The manufacturer has validated this antibody for FC in the species mouse.
59. Anti-CD38 BV421 (90) Mouse (BioLegend, 102732, Rat)  
<https://www.biolegend.com/nl-nl/products/brilliant-violet-421-anti-mouse-cd38-antibody-15883>  
 The manufacturer has validated this antibody for FC in the species mouse.
60. Anti-Rat IgG2b, k Isotype (BioLegend, 400601, Rat)  
<https://www.biolegend.com/nl-nl/products/purified-rat-igg2b-kappa-isotype-ctrl-1858>  
 The manufacturer has validated this antibody for FC in the species mouse.
61. Anti-I-A/I-E (M5/114.15.2) (BioLegend, 107601, Rat)  
<https://www.biolegend.com/nl-nl/products/purified-anti-mouse-i-a-i-e-antibody-368>  
 The manufacturer has validated this antibody for FC in the species mouse.
62. Anti-CD39 PE (Y23-1185) Mouse (BD Biosciences, 567104, Rat)  
<https://www.bdbiosciences.com/en-eu/products/reagents/flow-cytometry-reagents/research-reagents/single-color-antibodies-ruo/pe-rat-anti-mouse-cd39.567104>  
 The manufacturer has validated this antibody for FC in the species mouse.
63. Anti-CD8 $\alpha$  142Nd (53-6.7) Mouse (Lederer Lab CyTOF Core)  
<https://lederlab.bwh.harvard.edu/cytof-core/>  
 The manufacturer has validated this antibody for CyTOF in the species mouse.
64. Anti-CD4 145Nd (RM4-5) Mouse (Lederer Lab CyTOF Core)  
<https://lederlab.bwh.harvard.edu/cytof-core/>  
 The manufacturer has validated this antibody for CyTOF in the species mouse.
65. Anti-CD11c 146Nd (N418) Mouse (Lederer Lab CyTOF Core)  
<https://lederlab.bwh.harvard.edu/cytof-core/>  
 The manufacturer has validated this antibody for CyTOF in the species mouse.
66. Anti-TCR $\beta$  150Nd (H57-597) Mouse (Lederer Lab CyTOF Core)  
<https://lederlab.bwh.harvard.edu/cytof-core/>  
 The manufacturer has validated this antibody for CyTOF in the species mouse.
67. Anti-CD3 152Sm (145-2C11) Mouse (Lederer Lab CyTOF Core)  
<https://lederlab.bwh.harvard.edu/cytof-core/>  
 The manufacturer has validated this antibody for CyTOF in the species mouse.
68. Anti-CD19 156Gd (6D5) Mouse (Lederer Lab CyTOF Core)  
<https://lederlab.bwh.harvard.edu/cytof-core/>  
 The manufacturer has validated this antibody for CyTOF in the species mouse.
69. Anti-NK1.1 163 Dy (PK136) Mouse (Lederer Lab CyTOF Core)  
<https://lederlab.bwh.harvard.edu/cytof-core/>  
 The manufacturer has validated this antibody for CyTOF in the species mouse.
70. Anti-CD45 165Ho (30-F11) Mouse (Lederer Lab CyTOF Core)  
<https://lederlab.bwh.harvard.edu/cytof-core/>  
 The manufacturer has validated this antibody for CyTOF in the species mouse.
71. Anti-Anti-CD11b 169Tm (M1/70) Mouse (Lederer Lab CyTOF Core)  
<https://lederlab.bwh.harvard.edu/cytof-core/>  
 The manufacturer has validated this antibody for CyTOF in the species mouse.
72. Anti-Singlec-F 170Er (E50-2440) Mouse (Lederer Lab CyTOF Core)  
<https://lederlab.bwh.harvard.edu/cytof-core/>  
 The manufacturer has validated this antibody for CyTOF in the species mouse.
73. Anti-Ly6G 158Gd (1A8) Mouse (Lederer Lab CyTOF Core)  
<https://lederlab.bwh.harvard.edu/cytof-core/>  
 The manufacturer has validated this antibody for CyTOF in the species mouse.
74. Anti-Ly6C 151Eu (HK1.4) Mouse (Lederer Lab CyTOF Core)  
<https://lederlab.bwh.harvard.edu/cytof-core/>  
 The manufacturer has validated this antibody for CyTOF in the species mouse.
75. TotalSeq-A lyophilized antibodies Mouse (BioLegend, 99833)  
 The manufacturer has validated this antibody for CITE-seq in the species mouse.
76. TrueStain FcX Antibody (BioLegend, 101320, Rat)  
<https://www.biolegend.com/en-us/products/trustain-fcx-anti-mouse-cd16-32-antibody-5683>  
 The manufacturer has validated this antibody for Fc blocking in the species mouse.

## Eukaryotic cell lines

Policy information about [cell lines and Sex and Gender in Research](#)

|                                                                   |                                                                                                                                                                                                                                                                                                                                                                                                 |
|-------------------------------------------------------------------|-------------------------------------------------------------------------------------------------------------------------------------------------------------------------------------------------------------------------------------------------------------------------------------------------------------------------------------------------------------------------------------------------|
| Cell line source(s)                                               | Tsc2 <sup>-/-</sup> 105K renal tumor cells stably expressing empty vector or TSC2, Tsc2 WT and Tsc2 KO MEFs, 621-101 cells stably expressing empty vector or TSC2 were generated in-house. Tsc2 <sup>-/-</sup> TTJ renal tumor cells was a gift from Vera Krymskaya. A549, T47D and PC3 cells were purchased from ATCC. Raptor and Rictor inducible MEFs were the kind gifts from Michael Hall. |
| Authentication                                                    | TSC2-null and TSC2 add-back cell lines are routinely authenticated using western blotting and qPCR to confirm TSC2 protein loss and expression before conducting all experiments. All other cell lines were authenticated by the vendor.                                                                                                                                                        |
| Mycoplasma contamination                                          | Cells were tested for mycoplasma every month and were confirmed negative.                                                                                                                                                                                                                                                                                                                       |
| Commonly misidentified lines (See <a href="#">ICLAC</a> register) | No commonly misidentified cell lines were used in the study.                                                                                                                                                                                                                                                                                                                                    |

## Animals and other research organisms

Policy information about [studies involving animals](#); [ARRIVE guidelines](#) recommended for reporting animal research, and [Sex and Gender in Research](#)

|                         |                                                                                                                                                                          |
|-------------------------|--------------------------------------------------------------------------------------------------------------------------------------------------------------------------|
| Laboratory animals      | 6-8 week-old C57BL/6J, Ifngtm1Ts/J (Ifng KO), Rag1tm1Mom/J (Rag1 KO), Cd4tm1Mak/J (CD4 KO), Cd8atm1Mak/J (CD8 KO) and 7-month-old AJ Tsc2 <sup>+/-</sup> mice were used. |
| Wild animals            | No wild-animals were used in this study.                                                                                                                                 |
| Reporting on sex        | Sex and gender were not considered in study design.                                                                                                                      |
| Field-collected samples | No Field-collected samples were used in this study.                                                                                                                      |
| Ethics oversight        | All animal procedures were approved by the Brigham and Women's Hospital Institutional Animal Care and Use Committee.                                                     |

Note that full information on the approval of the study protocol must also be provided in the manuscript.

## Flow Cytometry

### Plots

Confirm that:

- The axis labels state the marker and fluorochrome used (e.g. CD4-FITC).
- The axis scales are clearly visible. Include numbers along axes only for bottom left plot of group (a 'group' is an analysis of identical markers).
- All plots are contour plots with outliers or pseudocolor plots.
- A numerical value for number of cells or percentage (with statistics) is provided.

### Methodology

|                           |                                                                                                                                                                                                                                                                                                                                                                                                                                                                                                                                                                                                                                                                                                                                                                                                                                                                                                                                                                                                                                                                                                                                                                        |
|---------------------------|------------------------------------------------------------------------------------------------------------------------------------------------------------------------------------------------------------------------------------------------------------------------------------------------------------------------------------------------------------------------------------------------------------------------------------------------------------------------------------------------------------------------------------------------------------------------------------------------------------------------------------------------------------------------------------------------------------------------------------------------------------------------------------------------------------------------------------------------------------------------------------------------------------------------------------------------------------------------------------------------------------------------------------------------------------------------------------------------------------------------------------------------------------------------|
| Sample preparation        | S.c. solid tumors were disrupted mechanically with a surgical scalpel and then enzymatically digested in HBSS (Invitrogen) containing 400 U/ml collagenase IV and 20U/ml DNase I, with constant rocking at 37oC for 45 minutes. The resulting cell suspension was passed through a 70-µm cell strainer and washed once with 1× PBS containing 0.4% FBS and 2.5 mM EDTA. Tumor-infiltrating immune cells were separated from other cells by centrifugation with the deceleration brake set at 1 at 1,260 g at 4oC for 25 minutes in a Ficoll gradient (17-1440-03, GE Healthcare). After centrifugation, TILs were collected for staining for flow cytometry. For in vitro T cell-coculture experiments, Splenic CD4 <sup>+</sup> or CD8 <sup>+</sup> T cells were isolated from naïve WT C57BL/6J mice using MojoSort Mouse CD4 T cell isolation Kit or MojoSort Mouse CD8 T cell isolation Kit, respectively and activated using Dynabeads Mouse T-Activator CD3/CD28 (GIBCO, Cat# 11452D) in RPMI medium plus 10% FBS for 16 hr before adding to tumor cells at a tumor-to-T-cell (E:T) ratio of 1:2 for 48 hr. Cells were processed and stained for flow cytometry. |
| Instrument                | BD LSR Fortessa, 17 Parameters                                                                                                                                                                                                                                                                                                                                                                                                                                                                                                                                                                                                                                                                                                                                                                                                                                                                                                                                                                                                                                                                                                                                         |
| Software                  | FlowJo X and GraphPad Prizm (v. 9.3.0).                                                                                                                                                                                                                                                                                                                                                                                                                                                                                                                                                                                                                                                                                                                                                                                                                                                                                                                                                                                                                                                                                                                                |
| Cell population abundance | The abundance is depended on the specific population, from 0-80%.                                                                                                                                                                                                                                                                                                                                                                                                                                                                                                                                                                                                                                                                                                                                                                                                                                                                                                                                                                                                                                                                                                      |
| Gating strategy           | The gating strategy for each experiment was supplied in supplementary figures. They were determined by single color stains where applicable. Generally, the first gating (FCS/SCC) was done on alive cells to exclude debris and dead cells, followed by the selection of single cells (FCS-H/SSC-W & FCS-H/FSC-W), excluding clumps. Then the specific fluorophores were confirmed                                                                                                                                                                                                                                                                                                                                                                                                                                                                                                                                                                                                                                                                                                                                                                                    |



and analyzed by comparing single color stains.

Tick this box to confirm that a figure exemplifying the gating strategy is provided in the Supplementary Information.
